# Supplementary material for: Diverse reactivity of a tricoordinate organoboron L2PhB: (L = oxazol-2-ylidene) towards alkali metal, group 9 metal, and coinage metal precursors
Source: PubMed Central journal article supplement (PMC5655907; doi:10.1039/c5sc00404g), 2015-02-23
Supplement: SC-006-C5SC00404G-s001.pdf [file SC-006-C5SC00404G-s001.pdf]

## Supplementary Information

### **Diverse Reactivity of A Tricoordinate Organoboron L<sub>2</sub>PhB: (L = oxazol-2-ylidene) towards Alkali Metal, Group 9 Metal, and Coinage Metal Precursors**

Lingbing Kong, Rakesh Ganguly, Yongxin Li, and Rei Kinjo\*

#### **This PDF file includes:**

Supplementary Text

Supplementary Figs. 1 to 34

Supplementary Note 1

Supplementary Tables 1 to 7

Supplementary References

## Method

**General.** All reactions were performed under an atmosphere of argon by using standard Schlenk or dry box techniques; solvents were dried over Na metal, K metal or CaH<sub>2</sub>. <sup>1</sup>H, <sup>13</sup>C, <sup>11</sup>B, <sup>7</sup>Li, and <sup>19</sup>F NMR spectra were obtained with AVIII 400MHz BBFO1 spectrometer at 298 K. NMR multiplicities are abbreviated as follows: s = singlet, d = doublet, t = triplet, m = multiplet, br = broad signal. Coupling constants *J* are given in Hz. Electrospray ionization (ESI) mass spectra were obtained at the Mass Spectrometry Laboratory at the Division of Chemistry and Biological Chemistry, Nanyang Technological University. Melting points were measured with an OpticMelt Stanford Research System. Fourier transform infrared (FT-IR) spectra were recorded on a SHIMADZU IRPrestige-21 spectrometer.

**Synthesis of 2:** A toluene solution (30 mL) of **1** (157 mg, 0.5 mmol) was added into lithium trifluoromethanesulfonate (78 mg, 0.5 mmol) at room temperature. The resulting suspension was stirred for 2 days at room temperature. All volatiles were removed under vacuum and washed with n-hexane to afford a yellow powder of **2** in 90 % yield. Mp: 146 °C (dec); <sup>1</sup>H NMR (400 MHz, C<sub>6</sub>D<sub>6</sub>): δ = 0.71 (s, 24H, CH<sub>3</sub>), 2.42 (s, 12H, N-CH<sub>3</sub>), 3.64 (s, 8H, CH<sub>2</sub>), 7.22 (br, 2H, *p*-CH), 7.37 (br, 4H, *m*-CH), 7.87 (br, 4H, *o*-CH); <sup>13</sup>C NMR (100.56 MHz, C<sub>6</sub>D<sub>6</sub>): δ = 22.2 (CH<sub>3</sub>), 30.4 (N-CH<sub>3</sub>), 60.6 (q), 77.4 (CH<sub>2</sub>), 126.5 (*p*), 128.2 (*m*), 138.1 (*o*), B-C and F-C were not observed; <sup>7</sup>Li NMR (116.6 MHz, C<sub>6</sub>D<sub>6</sub>): δ = 0.62 (s); <sup>11</sup>B NMR (128.3 MHz, C<sub>6</sub>D<sub>6</sub>): δ = 1.74 (s); <sup>19</sup>F NMR (376.3 MHz, C<sub>6</sub>D<sub>6</sub>): δ = -78.0 (s); HRMS (ESI): *m/z* calcd for C<sub>19</sub>H<sub>28</sub>BF<sub>3</sub>LiN<sub>2</sub>O<sub>5</sub>S: 471.1924 [(*M+H*)]<sup>+</sup>; found: 471.1914.

**Synthesis of 3:** 10 mL THF was added to the mixture of **1** (63 mg, 0.2 mmol) and [RhCl(COD)]<sub>2</sub> (50 mg, 0.1 mmol) and the resulting solution was stirred for 10 min. After

removal of solvent, the residue was washed with n-hexane and recrystallized from toluene to afford yellow crystals of **3** (51 mg, 45% yield). Mp: 105 °C (Dec). <sup>1</sup>H NMR (400 MHz, C<sub>6</sub>D<sub>6</sub>): δ = 0.24 (s, 3H, CH<sub>3</sub>), 0.77 (s, 3H, CH<sub>3</sub>), 0.91 (s, 3H, CH<sub>3</sub>), 1.71 (s, 3H, CH<sub>3</sub>), 1.94 (m, 4H, COD-CH<sub>2</sub>), 2.40 (m, 5H, COD-CH<sub>2</sub> and Rh-CH<sub>2</sub>), 2.97 (s, 3H, N-CH<sub>3</sub>), 3.24 (m, 1H, COD-CH), 3.38 (m, 1H, COD-CH), 3.45 (t, 2H, <sup>2</sup>J = 8.1 Hz, CH<sub>2</sub>), 3.90 (d, 1H, <sup>2</sup>J = 8.8 Hz, CH<sub>2</sub>), 4.08 (d, 1H, <sup>2</sup>J = 8.8 Hz, CH<sub>2</sub>), 4.18 (br, 1H, COD-CH<sub>2</sub>), 4.96 (m, 1H, COD-CH), 5.15 (m, 1H, COD-CH), 7.23 (t, 1H, <sup>3</sup>J = 7.4 Hz, *p*-C<sub>6</sub>H<sub>5</sub>), 7.40 (t, 2H, <sup>3</sup>J = 7.4 Hz, *m*-C<sub>6</sub>H<sub>5</sub>), 7.86 (2H, d, <sup>3</sup>J = 7.1 Hz, *o*-C<sub>6</sub>H<sub>5</sub>); <sup>13</sup>C NMR (100.56 MHz, C<sub>6</sub>D<sub>6</sub>): δ = 22.5 (CH<sub>3</sub>), 24.0 (CH<sub>3</sub>), 25.3 (CH<sub>3</sub>), 25.4 (CH<sub>3</sub>), 29.4 (N-CH<sub>3</sub>), 30.2 (COD-CH<sub>2</sub>), 30.6 (COD-CH<sub>2</sub>), 33.2 (COD-CH<sub>2</sub>), 33.3 (COD-CH<sub>2</sub>), 39.7 (d, *J*<sub>RhC</sub> = 31.8 Hz, Rh-CH<sub>2</sub>), 63.7 (q), 65.1 (q), 67.4 (d, *J*<sub>RhC</sub> = 16.6 Hz, COD-CH), 67.8 (d, *J*<sub>RhC</sub> = 16.3 Hz, COD-CH), 79.2 (CH<sub>2</sub>), 80.8 (CH<sub>2</sub>), 87.4 (d, *J*<sub>RhC</sub> = 7.5 Hz, COD-CH), 87.9 (d, *J*<sub>RhC</sub> = 7.4 Hz, COD-CH), 126.1 (*p*), 127.9 (*m*), 135.5(*o*); <sup>11</sup>B NMR (128.3 MHz, C<sub>6</sub>D<sub>6</sub>): δ = -21.0 (d, *J*<sub>BH</sub> = 34.0 Hz); HRMS (ESI): *m/z* calcd for C<sub>26</sub>H<sub>40</sub>BClN<sub>2</sub>O<sub>2</sub>Rh: 561.1779 [(*M*+*H*)]<sup>+</sup>; found: 561.1906.

**Synthesis of 4:** 10 mL THF was added to the mixture of **1** (63 mg, 0.2 mmol) and [IrCl(COD)]<sub>2</sub> (67 mg, 0.1 mmol) and the resulting solution was stirred for 10 min. After removal of solvent, the residue was washed with n-hexane and recrystallized from toluene and THF to afford colorless crystals of **4** (100 mg, 80% yield). Mp: 145 °C. <sup>1</sup>H NMR (400 MHz, CD<sub>2</sub>Cl<sub>2</sub>): δ = -7.56 (br, 1H, B-H), 1.31 (m, 1H, COD-CH<sub>2</sub>), 1.37 (s, 3H, CH<sub>3</sub>), 1.41 (s, 3H, CH<sub>3</sub>), 1.43 (s, 3H, CH<sub>3</sub>), 1.44 (s, 3H, CH<sub>3</sub>), 1.72 (m, 1.5H, COD-CH<sub>2</sub>), 1.83 (m, 2H, COD-CH<sub>2</sub>), 2.03 (m, 1H, COD-CH), 2.22 (m, 1.5H, COD-CH<sub>2</sub>), 2.66 (m, 1H, COD-CH<sub>2</sub>), 2.81 (m, 1H, COD-CH<sub>2</sub>), 3.43 (s, 3H, N-CH<sub>3</sub>), 3.84 (d, 1H, <sup>2</sup>J = 11.6 Hz, Ir-CH<sub>2</sub>), 4.24 (d,

1H,  $^2J = 8.8$  Hz, CH<sub>2</sub>), 4.31 (d, 1H,  $^2J = 8.8$  Hz, CH<sub>2</sub>), 4.44 (d, 1H,  $^2J = 9.1$  Hz, CH<sub>2</sub>), 4.60 (d, 1H,  $^2J = 9.1$  Hz, CH<sub>2</sub>), 4.68 (d, 1H,  $^2J = 11.6$  Hz, Ir-CH<sub>2</sub>), 5.17 (m, 1H, COD-CH), 5.66 (m, 1H, COD-CH), 7.12 (t, 1H,  $^3J = 7.2$  Hz, *p*-C<sub>6</sub>H<sub>5</sub>); 7.20 (t, 2H,  $^3J = 7.4$  Hz, *m*-C<sub>6</sub>H<sub>5</sub>); 7.41 (2H, d,  $^3J = 6.7$  Hz, *o*-C<sub>6</sub>H<sub>5</sub>); <sup>13</sup>C NMR (100.56 MHz, CD<sub>2</sub>Cl<sub>2</sub>):  $\delta = 13.7$  (Ir-CH), 24.1 (CH<sub>3</sub>), 24.5 (CH<sub>3</sub>), 24.6 (CH<sub>3</sub>), 24.8 (COD-CH<sub>2</sub>), 25.2 (CH<sub>3</sub>), 26.3 (COD-CH<sub>2</sub>), 26.7 (COD-CH<sub>2</sub>), 27.1 (COD-CH<sub>2</sub>), 30.7 (N-CH<sub>3</sub>), 43.1 (Ir-CH<sub>2</sub>), 64.2 (q), 64.5 (q), 81.1 (CH<sub>2</sub>), 85.5 (CH<sub>2</sub>), 88.4 (COD-CH), 93.2 (COD-CH), 125.6 (*p*), 127.2 (*m*), 133.4 (*o*), 190.7 (carbene-C); <sup>11</sup>B NMR (128.3 MHz, CD<sub>2</sub>Cl<sub>2</sub>):  $\delta = -22.8$  (br); HRMS (ESI): *m/z* calcd for C<sub>26</sub>H<sub>39</sub>BIrN<sub>2</sub>O<sub>2</sub>: 615.2734 [(*M* - Cl)]<sup>+</sup>; found: 615.2726; IR (KBr, cm<sup>-1</sup>): IR (KBr, cm<sup>-1</sup>): 1618.28 (Ir-H-B).

**Synthesis of 5:** A THF solution (5 mL) of **1** (16 mg, 0.05 mmol) was added into coinage metal chlorides (0.1 mmol) at room temperature. Color changed immediately from orange to colorless with some black metal precipitated. After the metal was filtered off, all volatiles were removed under vacuum to afford a colorless powder of **5** in 98 % yield. Mp: 146 °C (dec); <sup>1</sup>H NMR (400 MHz, THF-d<sub>8</sub>):  $\delta = 1.48$  (s, 6H, CH<sub>3</sub>), 1.56 (s, 6 H, CH<sub>3</sub>), 3.20 (s, 6H, N-CH<sub>3</sub>), 4.73 (d, 2H,  $^2J = 9.7$  Hz, CH<sub>2</sub>), 4.81 (d, 2H,  $^2J = 9.7$  Hz, CH<sub>2</sub>), 7.23 (t, 1H,  $^3J = 7.3$  Hz, *p*-CH), 7.30 (t, 2H,  $^3J = 7.4$  Hz, *m*-CH), 7.49 (2H, d,  $^3J = 6.8$  Hz, *o*-CH); <sup>13</sup>C NMR (100.56 MHz, THF-d<sub>8</sub>):  $\delta = 23.6$  (CH<sub>3</sub>), 23.9 (CH<sub>3</sub>), 29.9 (N-CH<sub>3</sub>), 68.1 (q), 82.6 (CH<sub>2</sub>), 128.2 (*p*), 128.5 (*m*), 133.1 (*o*), B-C was not observed; <sup>11</sup>B NMR (128.3 MHz, THF-d<sub>8</sub>):  $\delta = -11.2$  (s); HRMS (ESI): *m/z* calcd for C<sub>18</sub>H<sub>27</sub>BCIN<sub>2</sub>O<sub>2</sub>: 349.1854 [(*M*)]<sup>+</sup>; found: 349.1860.

**Synthesis of 6:** A solution of **1** (157 mg, 0.5 mmol) in THF (10 mL) was added to a solution of (IPr)AuCl (310 mg, 0.5 mmol) in THF (10 mL) at room temperature under dark conditions. The mixture was stirred for 10 min. All volatiles were removed in vacuo. After

the residue was washed with toluene (10 mL), the solvent was removed under vacuum to afford **6** as a white solid in 95% yield. Mp: 212 °C (dec). <sup>1</sup>H NMR (400 MHz, CD<sub>2</sub>Cl<sub>2</sub>): δ = 1.07 (s, 6H, CH<sub>3</sub>), 1.10 (s, 6H, CH<sub>3</sub>), 1.22 (d, 12H, <sup>3</sup>J = 6.9 Hz, (CH<sub>3</sub>)<sub>2</sub>CH), 1.28 (d, 12H, <sup>3</sup>J = 6.9 Hz, (CH<sub>3</sub>)<sub>2</sub>CH), 2.30 (s, 6H, N-CH<sub>3</sub>), 2.66 (sept, 4H, <sup>3</sup>J = 6.9 Hz, (CH<sub>3</sub>)<sub>2</sub>CH), 3.96 (d, 2H, <sup>2</sup>J = 9.0 Hz, CH<sub>2</sub>), 4.10 (d, 2H, <sup>2</sup>J = 9.0 Hz, CH<sub>2</sub>), 6.97 (br, 5H, Ph-H), 7.24 (s, 2H, N-CH), 7.30 (d, 4H, <sup>3</sup>J = 7.8 Hz, Dipp-H), 7.51 (t, 2H, <sup>3</sup>J = 7.8 Hz, Dipp-H); <sup>13</sup>C NMR (100.56 MHz, CD<sub>2</sub>Cl<sub>2</sub>): δ = 24.0 (CH<sub>3</sub>), 24.1 ((CH<sub>3</sub>)<sub>2</sub>CH), 24.2 (CH<sub>3</sub>), 24.7 ((CH<sub>3</sub>)<sub>2</sub>CH), 29.1 ((CH<sub>3</sub>)<sub>2</sub>CH), 29.3 (N-CH<sub>3</sub>), 64.0 (q), 79.9 (CH<sub>2</sub>), 123.8 (CH), 124.4 (CH), 125.2 (CH), 127.3 (CH), 130.8 (CH), 135.1 (q), 138.5 (CH), 146.3 (q), carbene carbon and B-C were not observed; <sup>11</sup>B NMR (128.3 MHz, CD<sub>2</sub>Cl<sub>2</sub>): δ = -15.1 (s); HRMS (ESI): *m/z* calcd for C<sub>45</sub>H<sub>63</sub>AuBN<sub>4</sub>O<sub>2</sub>: 899.4710 [(M)]<sup>+</sup>; found: 899.4714; IR (KBr, cm<sup>-1</sup>): IR (KBr, cm<sup>-1</sup>): 570.93 (Au-B).

**Synthesis of compound 8:** A solution of **1** (78 mg, 0.25 mmol) in acetonitrile (10 mL) was added dropwise to a solution of (Ph<sub>3</sub>P)AuCl (124 mg, 0.25 mmol) in acetonitrile (10 mL) at room temperature under dark conditions. The mixture was stirred for 10 min. All volatiles were removed in vacuo. After the residue was washed with 20 mL n-hexane, the solvent was removed under vacuum to give **7** as a colorless powder in 80% yield. Mp: 118 °C (dec). <sup>1</sup>H NMR (400 MHz, CD<sub>3</sub>CN): δ = 1.29 (s, 6H, CH<sub>3</sub>), 1.33 (s, 6 H, CH<sub>3</sub>), 3.01 (s, 6H, N-CH<sub>3</sub>), 4.27 (d, 2H, <sup>2</sup>J = 9.3 Hz, CH<sub>2</sub>), 4.30 (d, 4H, <sup>2</sup>J = 9.3 Hz, CH<sub>2</sub>), 7.06 (t, 1H, <sup>3</sup>J = 7.3 Hz, *p*-CH), 7.14 (t, 2H, <sup>3</sup>J = 7.2 Hz, *m*-CH), 7.38 (d, 4H, <sup>3</sup>J = 5.6 Hz, *o*-CH); <sup>13</sup>C NMR (100.56 MHz, CD<sub>3</sub>CN): δ = 23.7 (CH<sub>3</sub>), 23.8 (CH<sub>3</sub>), 65.5 (q), 80.7 (CH<sub>2</sub>), 125.8 (CH), 127.9 (CH), 138.8 (CH), B-C was not observed; <sup>11</sup>B NMR (128.3 MHz, CD<sub>3</sub>CN): δ = -18.6 (s); HRMS

(ESI):  $m/z$  calcd for  $C_{18}H_{28}AuBClN_2O_2$ : 547.1598  $[(M+H)]^+$ ; found: 547.1611; IR (KBr,  $cm^{-1}$ ): 586.36 (Au–B).

**General procedure for catalysis:**

All the substrates were dried before used and known catalytically produced products were identified by comparison to their reported spectroscopic data (**11aa**<sup>1</sup>, **11ab**<sup>2</sup>, **11ac**<sup>3</sup>, **11ba**<sup>4</sup>, **11bb**<sup>4</sup>, **11bc**<sup>5</sup>, **11ca**<sup>1</sup>, **11db**<sup>6</sup>, **11ea**<sup>7</sup>, **11eb**<sup>6</sup>, **13**<sup>8</sup>, **15**<sup>9</sup>, **17**<sup>10</sup>, **19**<sup>11</sup>, **21**<sup>12</sup>, **23**<sup>13</sup>)

To a small screw-cap scintillation vial equipped with a magnetic stir bar and charged with a solution of substrates (1 eq) in benzene or DCE(0.65M) was added catalyst **8** (5 mol %) followed by  $KBAR^F_4$  (5 mol%). The reaction mixture was then stirred at room temperature and monitored periodically by  $^1H$  NMR. Upon completion, the imines products were purified *via* vacuum distillation (liquid residue) or recrystallization from methanol. The other products were purified on silica gel with the appropriate mixture of n-hexane and EtOAc.

**11ec**: Yellow solid. Mp:128 °C.  $^1H$  NMR (400 MHz,  $CDCl_3$ ):  $\delta$  = 1.12 (d, 6H,  $^3J$  = 3.6 Hz,  $(CH_3)_2CH$ ), 1.14 (d, 6 H,  $^3J$  = 3.6 Hz,  $(CH_3)_2CH$ ), 2.07 (s, 3H, N- $CH_3$ ), 2.69 (sept, 2H,  $^3J$  = 3.6 Hz,  $(CH_3)_2CH$ ), 7.07 (t, 1H,  $^3J$  = 6.6 Hz, Dipp- $H$ ), 7.14 (d, 2H,  $^3J$  = 7.0Hz, Dipp- $H$ ), 7.60 (d, 2H,  $^3J$  = 8.6 Hz, Ar- $H$ ), 7.90 (d, 2H,  $^3J$  = 8.6 Hz, Ar- $H$ );  $^{13}C$  NMR (100.56 MHz,  $CDCl_3$ ):  $\delta$  = 18.0 (N- $CH_3$ ), 23.0 ( $(CH_3)_2CH$ ), 23.3 ( $(CH_3)_2CH$ ), 28.4 ( $(CH_3)_2CH$ ), 123.1 (CH), 123.6 (CH), 125.2 (q), 128.9 (CH), 131.7 (CH), 136.1 (q), 138.0 (q), 146.6 (q), 163.9 (N=C); HRMS (ESI):  $m/z$  calcd for  $C_{20}H_{25}NBr$ : 358.1170  $[(M+H)]^+$ ; found: 358.1169.

## Crystallographic details

X-ray data collection and structural refinement. Intensity data for compounds **2**, **3**, **4**, **6** and **8** was collected using a Bruker APEX II diffractometer. The crystals were measured at 103(2) K. The structure was solved by direct phase determination (SHELX-2013) and refined on all data by full-matrix least squares methods on  $F^2$ .<sup>S14</sup> All non-hydrogen atoms were subjected to anisotropic refinement. The hydrogen atoms were generated geometrically and allowed to ride in their respective parent atoms; they were assigned appropriate isotropic thermal parameters and included in the structure-factor calculations. CCDC; 1011533, 1011534, 1038665, 108666 and 1038667 contains the supplementary crystallographic data for this paper. The data can be obtained free of charge from the Cambridge Crystallography Data Center via [www.ccdc.cam.ac.uk/data\\_request/cif](http://www.ccdc.cam.ac.uk/data_request/cif).

## Computational details

Gaussian 09 was used for all density functional theory (DFT) calculations.<sup>S15</sup> Geometry optimization and frequency calculations, Natural bond order (NBO) analysis of compounds **2**, **3**, **4**, **6** and **8** were performed at the M052x/6-311G(d,p) level of theory, with the LANL2TZ(f) pseudo-potential applied for the metal atoms. Calculated bond dissociation energies  $D_e$  [kcal mol<sup>-1</sup>] of compounds **6**, **7**, **8**, **1·AgCl** and their subunits were performed at the M052x/6-311G(d,p) level of theory, with the LANL2TZ(f) pseudo-potential applied for the metal atoms.

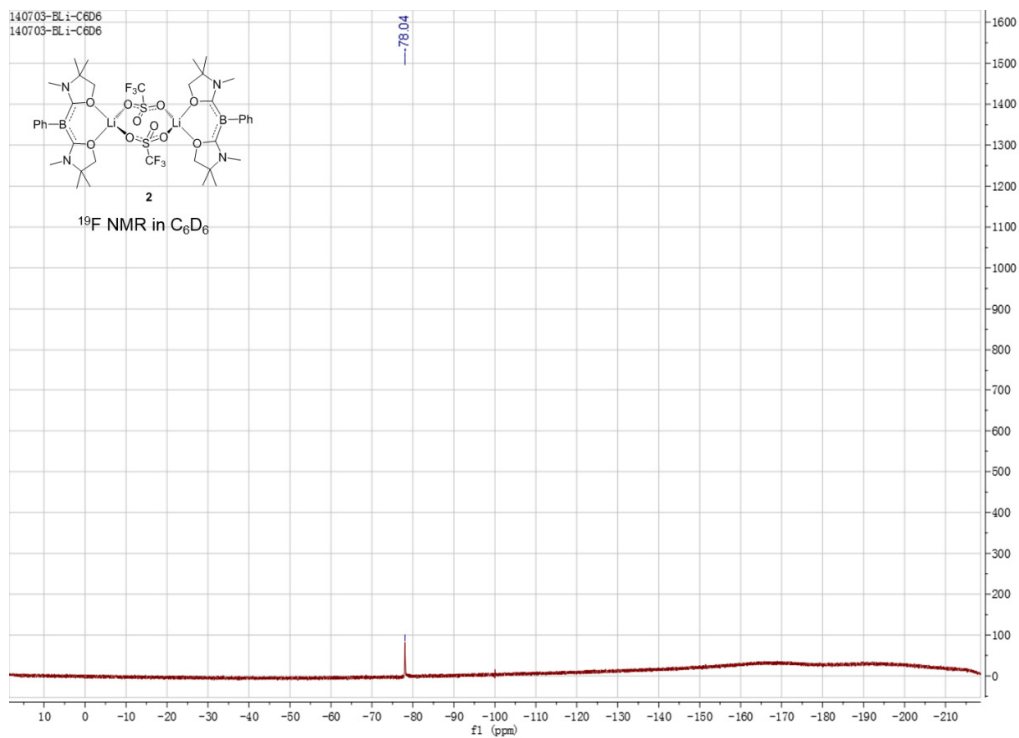

Supplementary Fig. 1  $^{19}\text{F}$  NMR spectrum of 2.

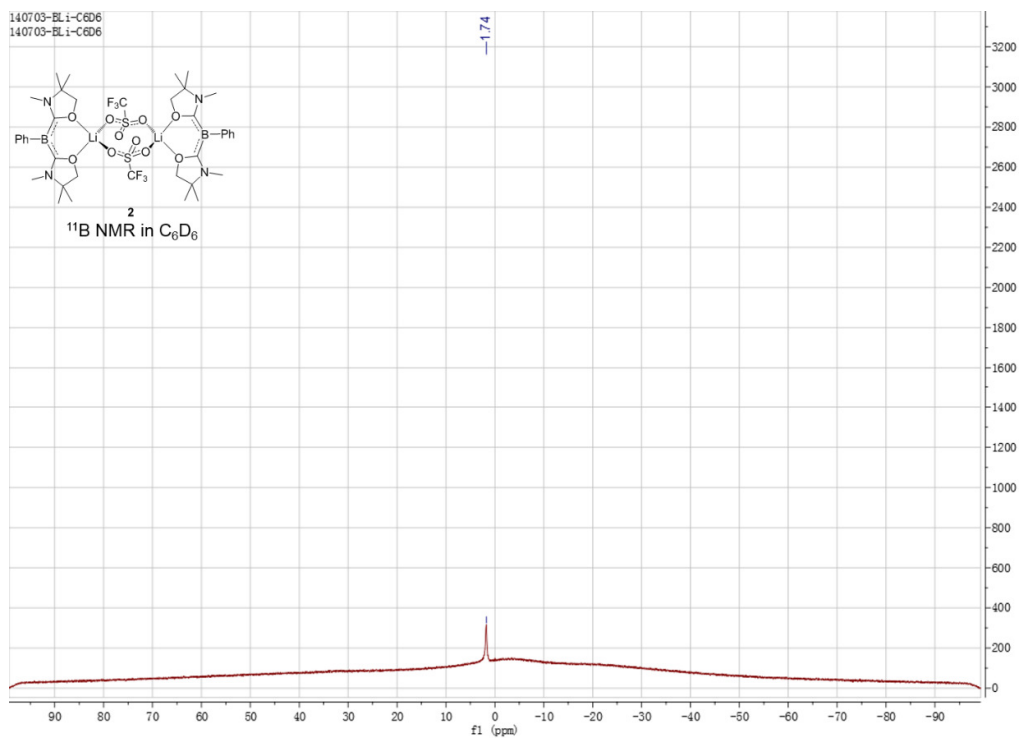

Supplementary Fig. 2  $^{11}\text{B}$  NMR spectrum of 2.



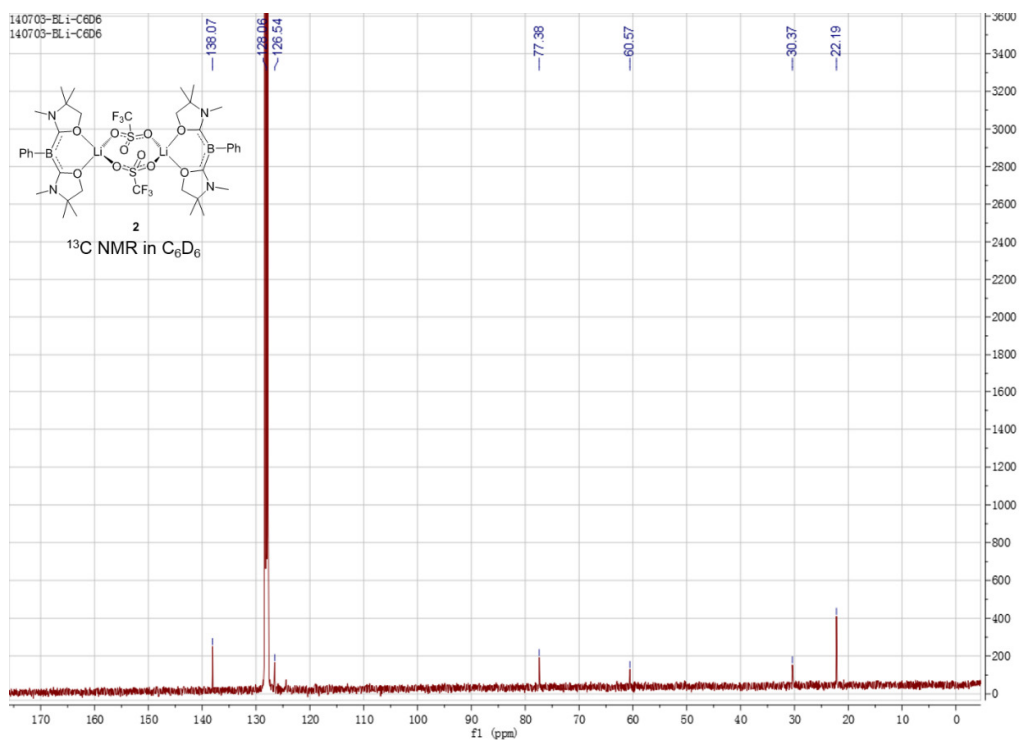

Supplementary Fig. 3 <sup>13</sup>C NMR spectrum of **2**.

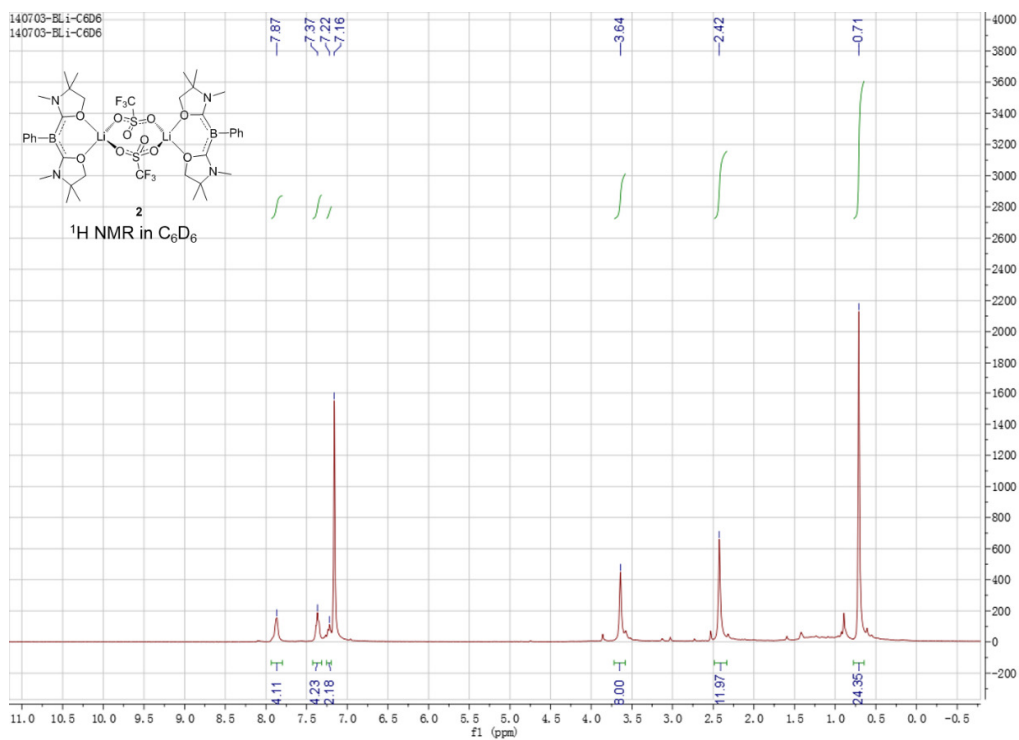

Supplementary Fig. 4 <sup>1</sup>H NMR spectrum of **2**.

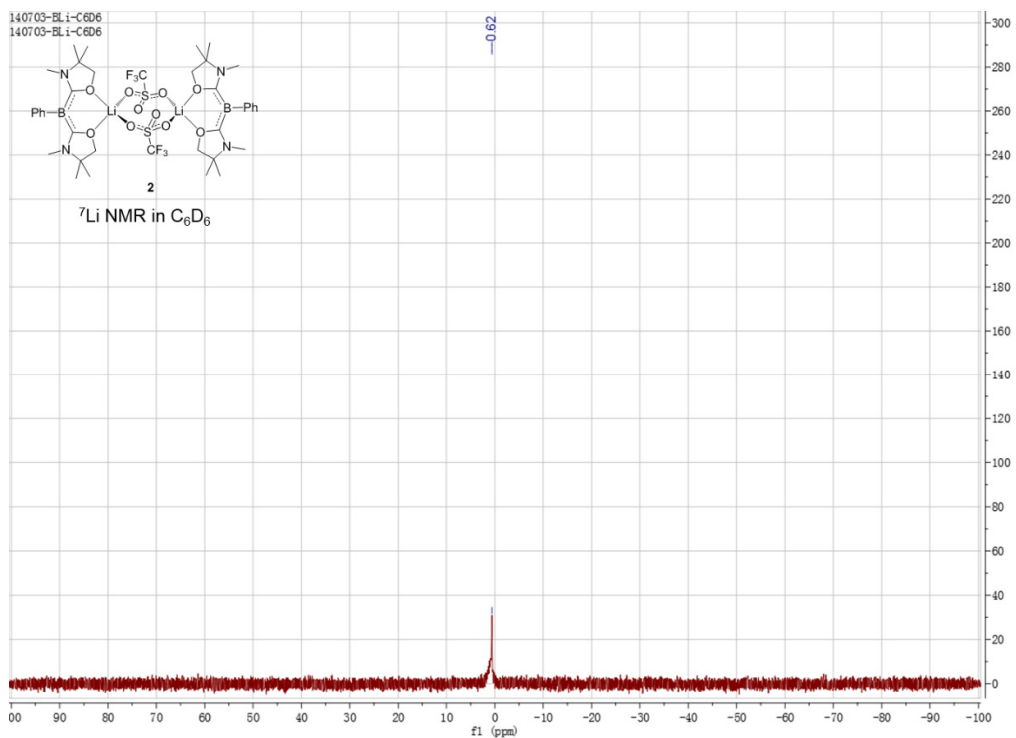

Supplementary Fig. 5  $^7\text{Li}$  NMR spectrum of **2**.

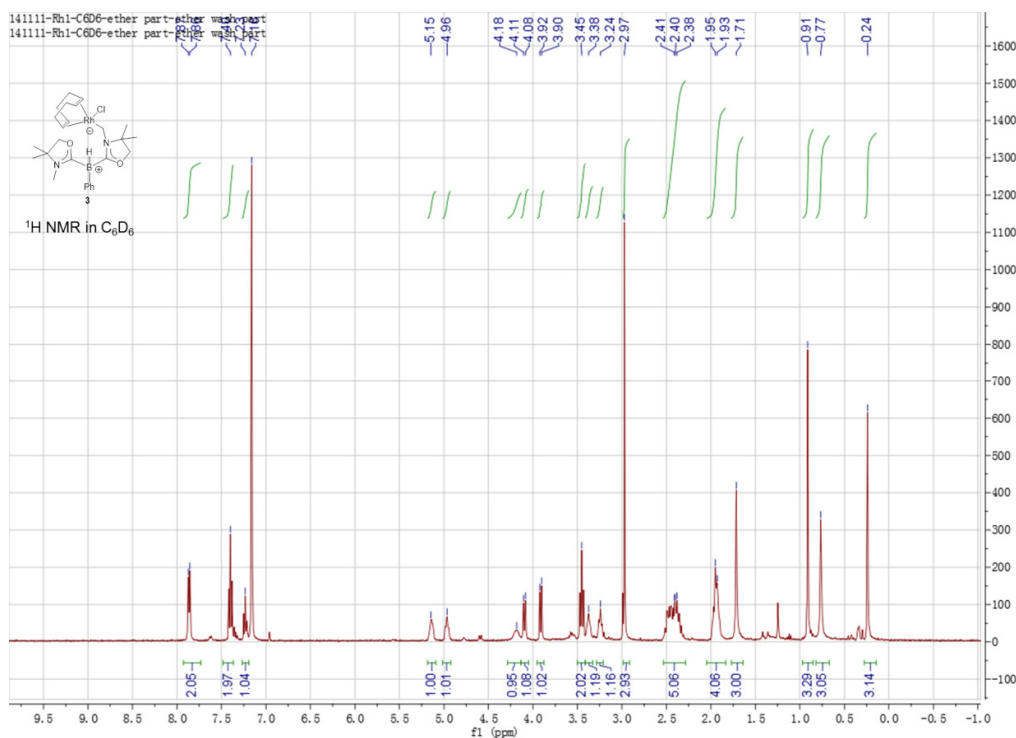

Supplementary Fig. 6  $^1\text{H}$  NMR spectrum of **3**.

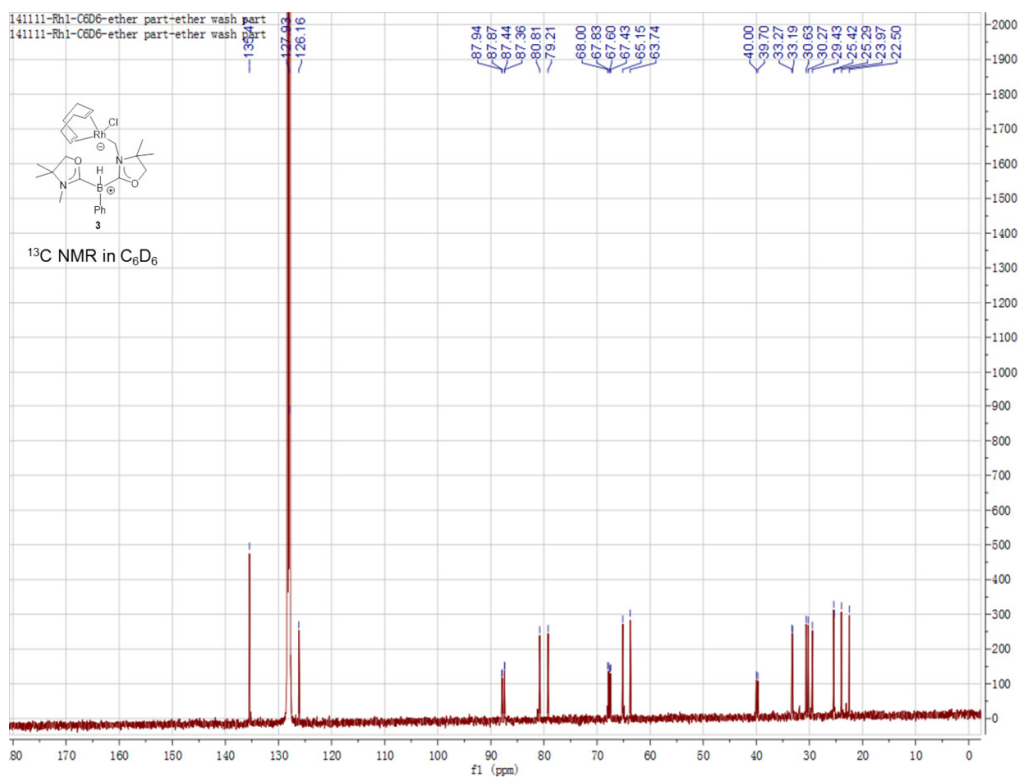

Supplementary Fig. 7  $^{13}\text{C}$  NMR spectrum of 3.

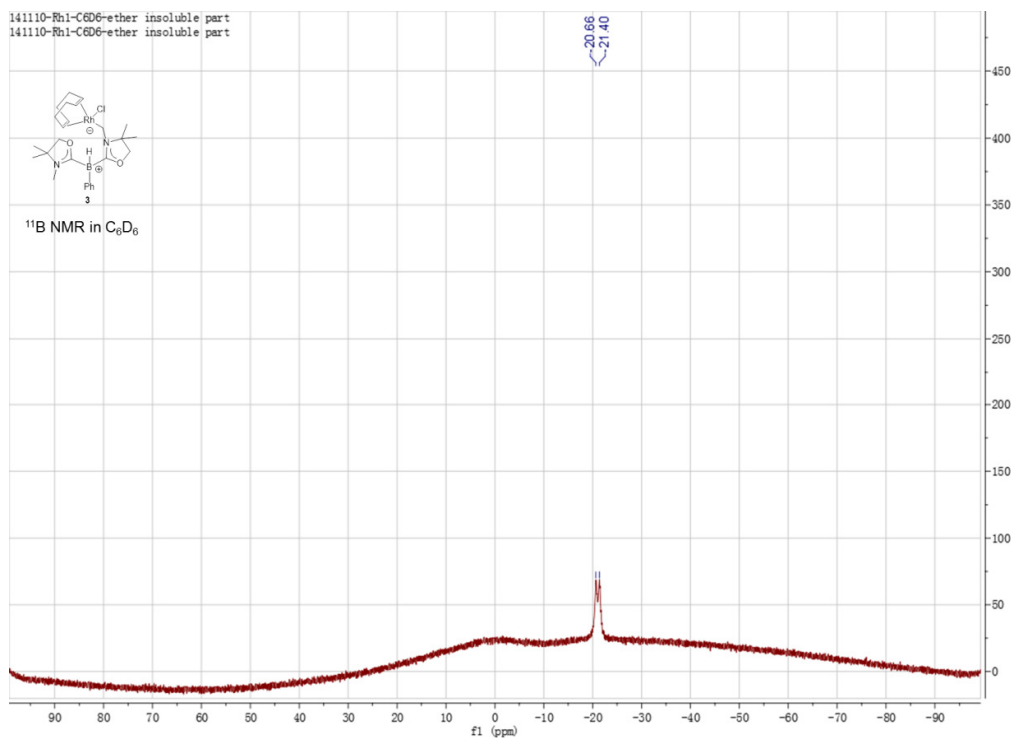

Supplementary Fig. 8  $^{11}\text{B}$  NMR spectrum of 3.

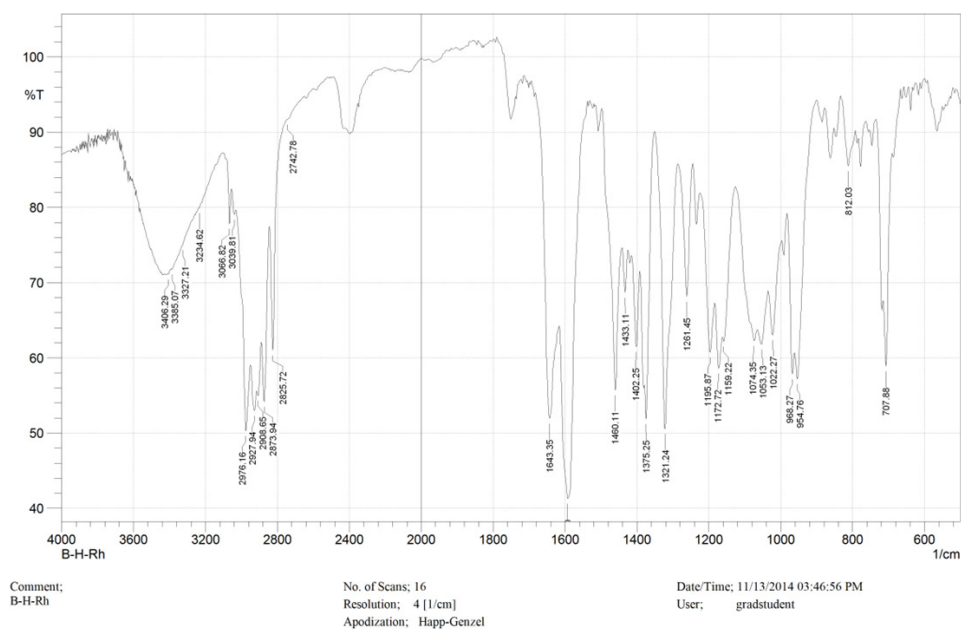

Supplementary Fig. 9 IR spectrum of 3.

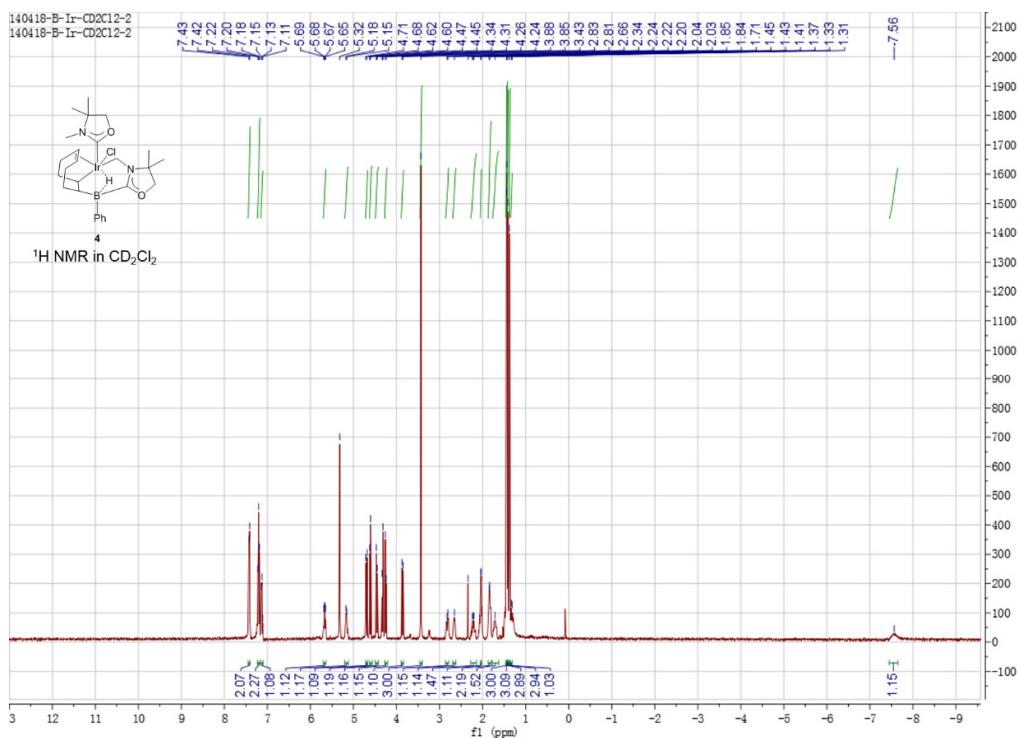Supplementary Fig. 10 <sup>1</sup>H NMR spectrum of 4.

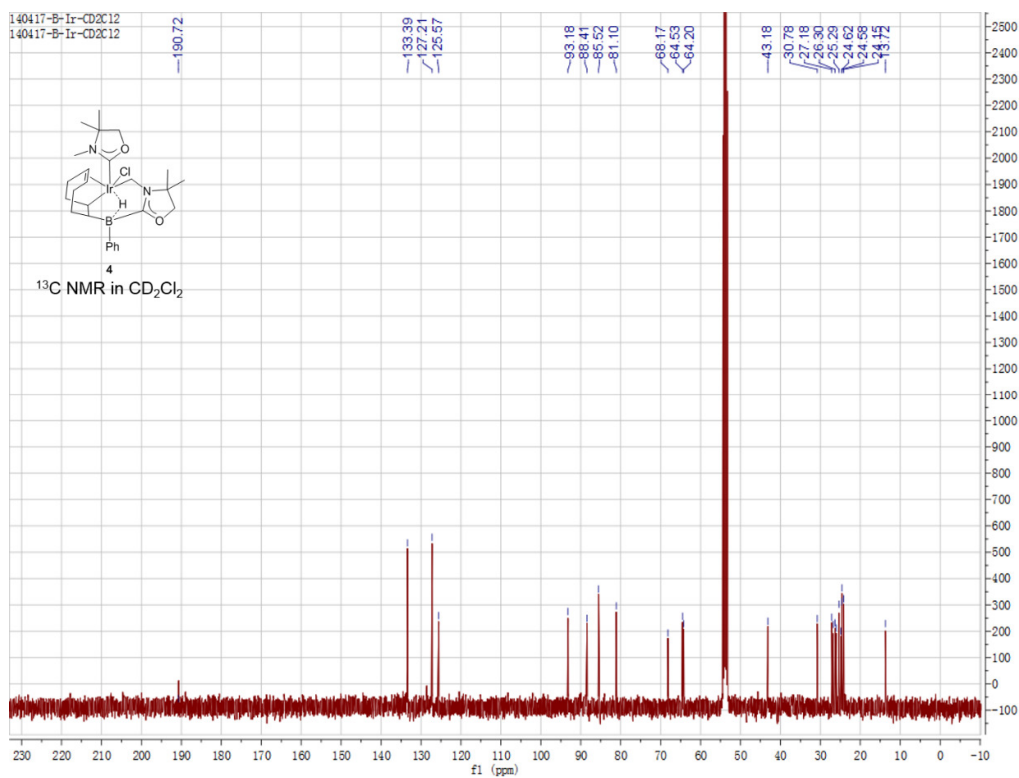

Supplementary Fig. 11  $^{13}\text{C}$  NMR spectrum of **4**.

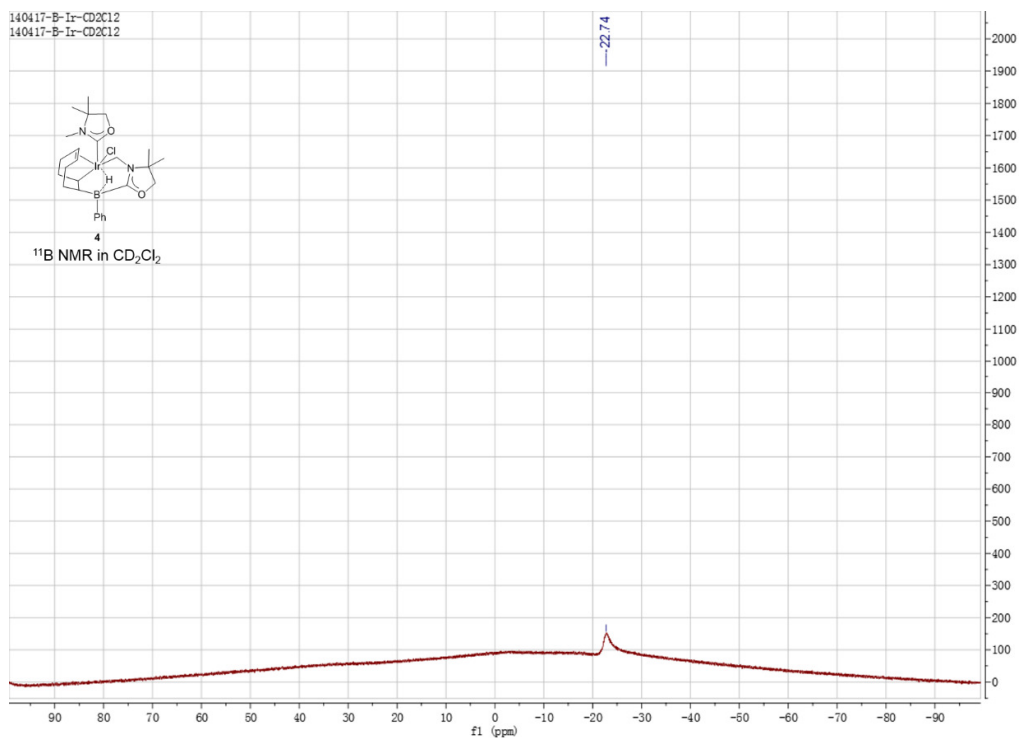

Supplementary Fig. 12  $^{11}\text{B}$  NMR spectrum of **4**.

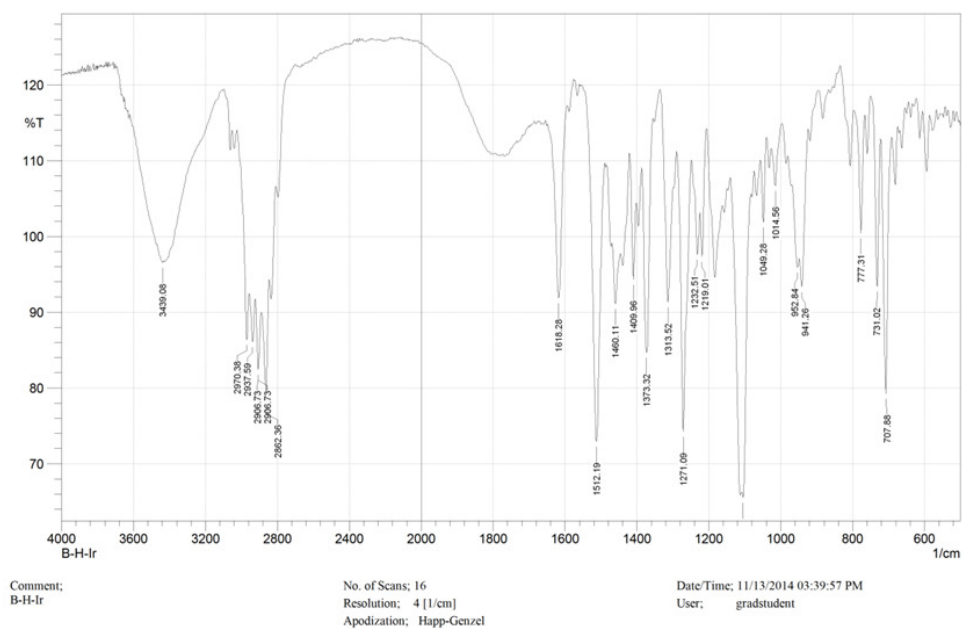

Supplementary Fig. 13 IR spectrum of compound 4.

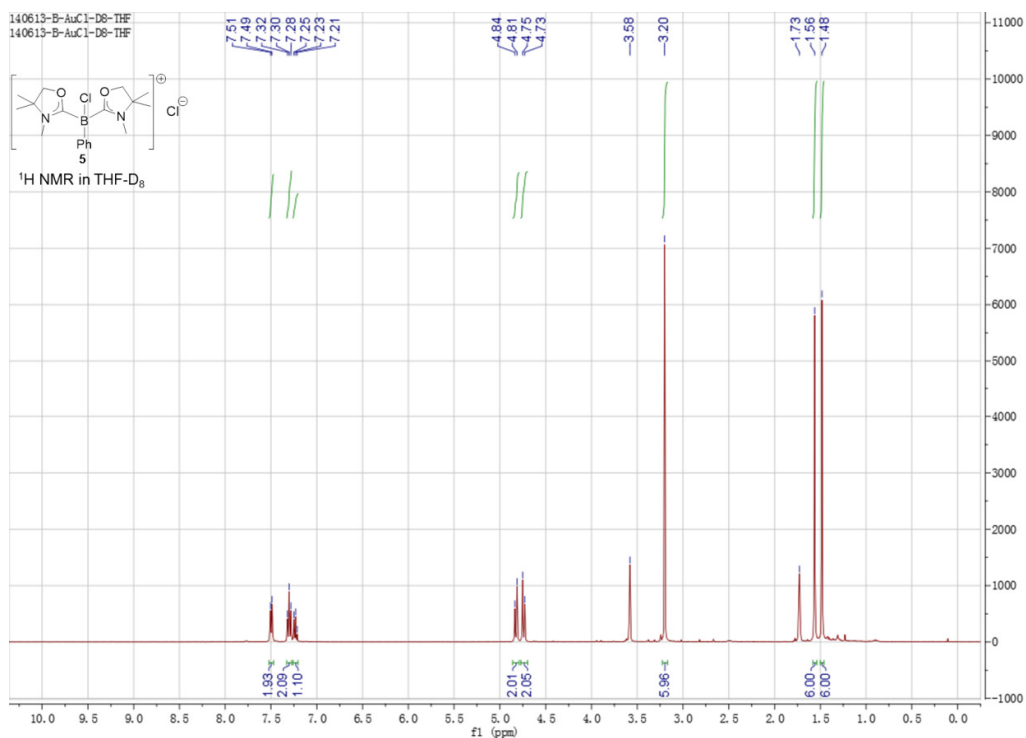Supplementary Fig. 14 <sup>1</sup>H NMR spectrum of 5.

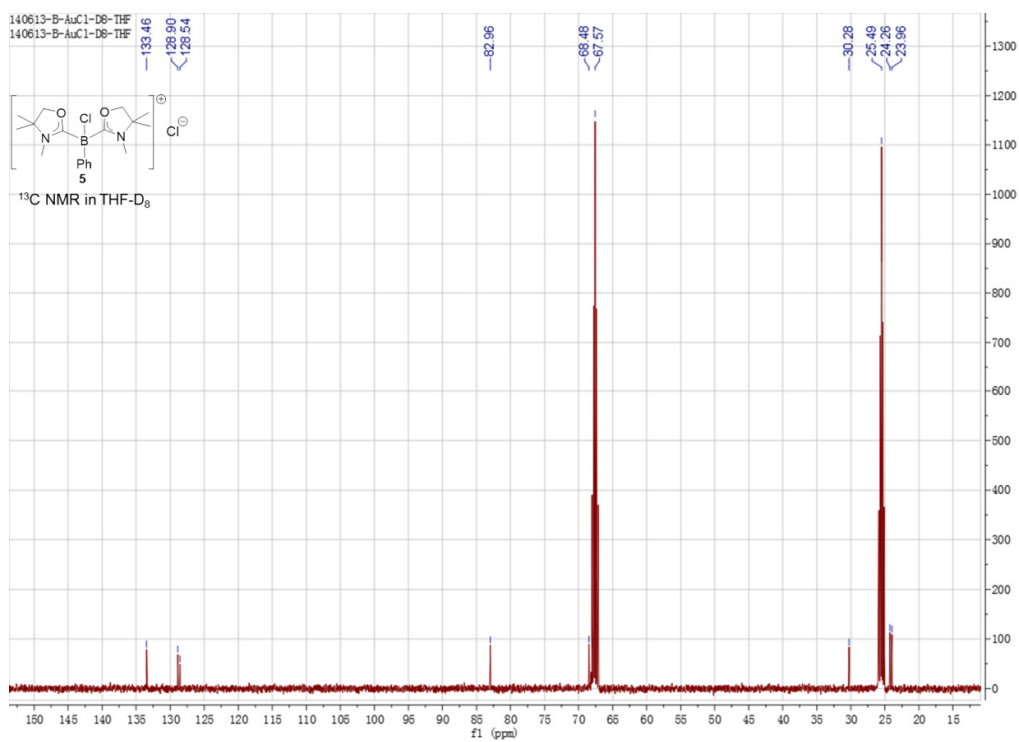

Supplementary Fig. 15  $^{13}\text{C}$  NMR spectrum of **5**.

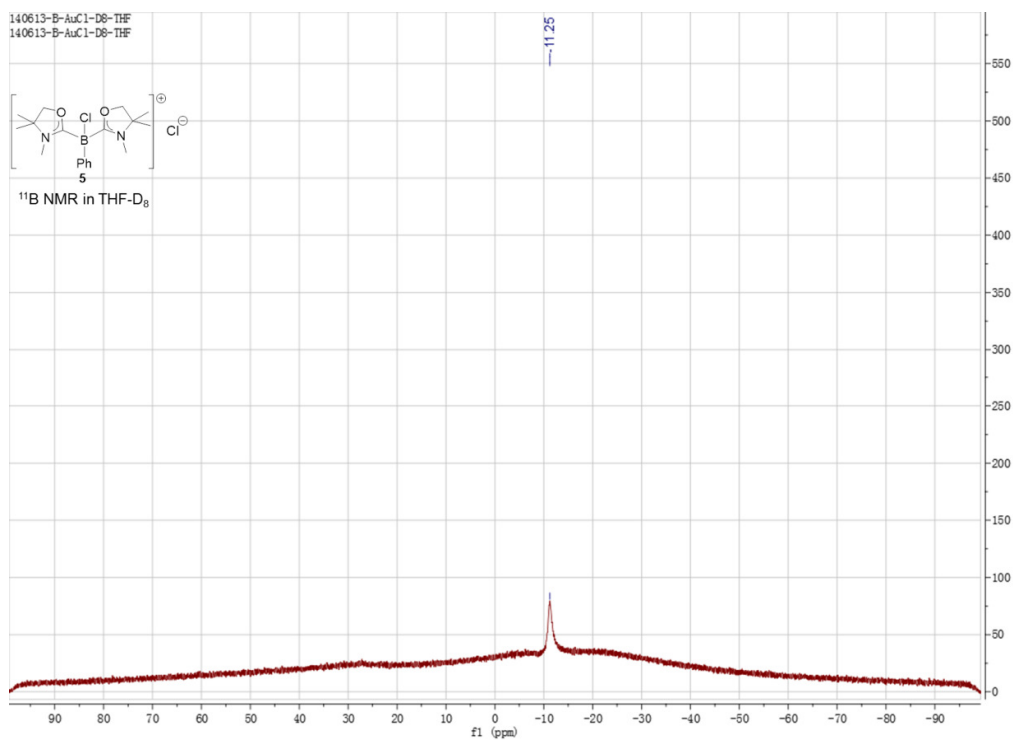

Supplementary Fig. 16  $^{11}\text{B}$  NMR spectrum of **5**.

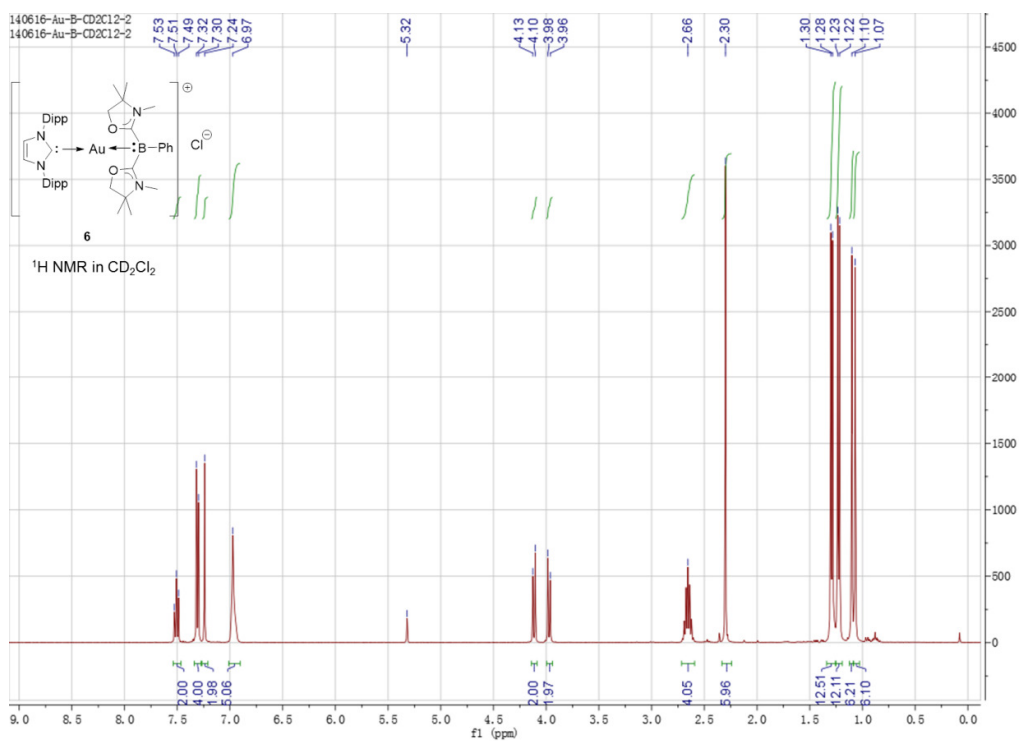

Supplementary Fig. 17 <sup>1</sup>H NMR spectrum of **6**.

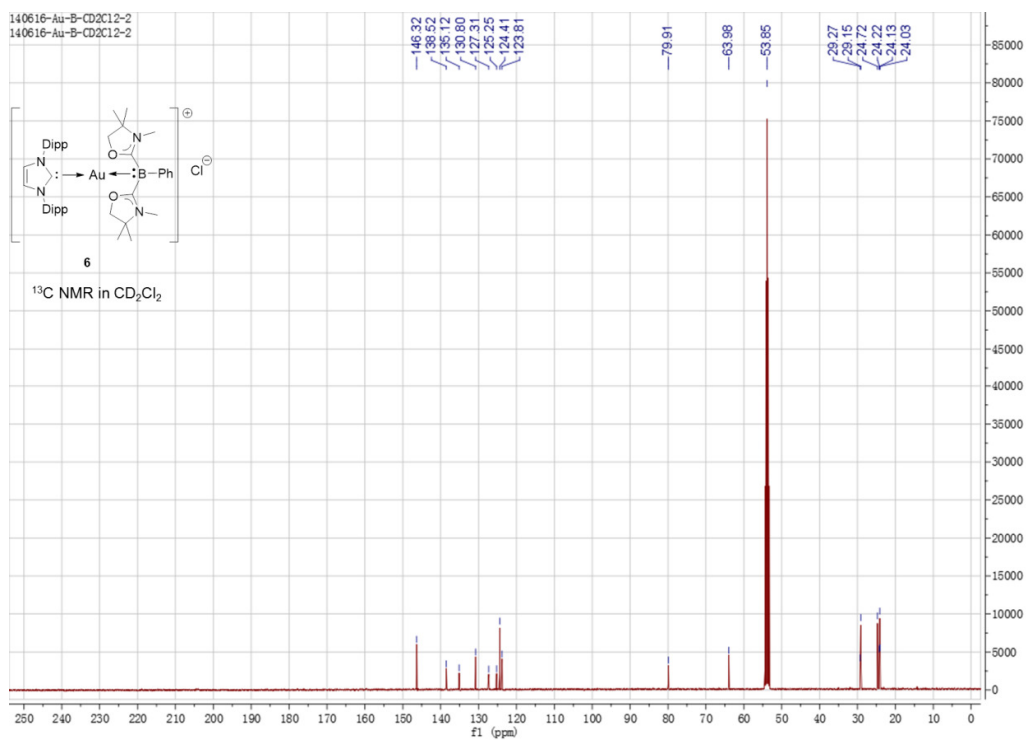

Supplementary Fig. 18 <sup>13</sup>C NMR spectrum of **6**.



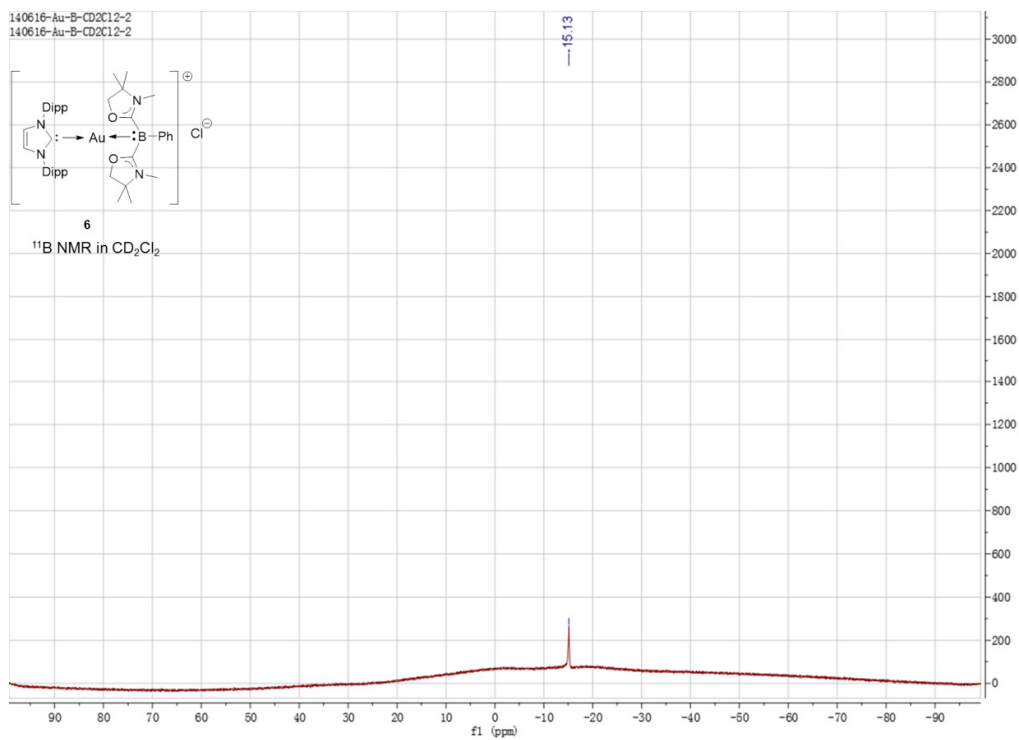

Supplementary Fig. 19  $^{11}\text{B}$  NMR spectrum of 6.

SHIMADZU

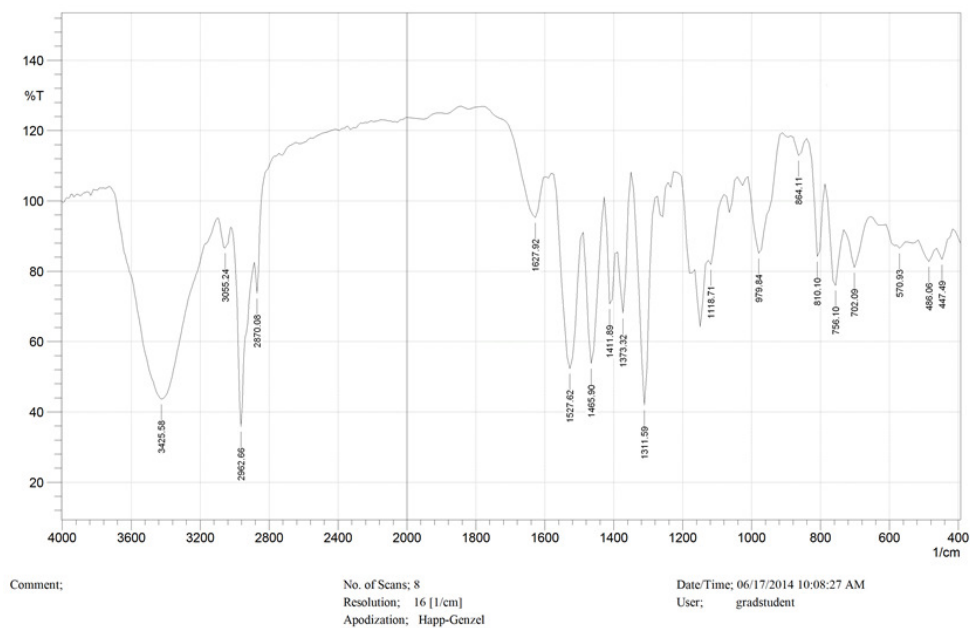

Supplementary Fig. 20 IR spectrum of compound 6.

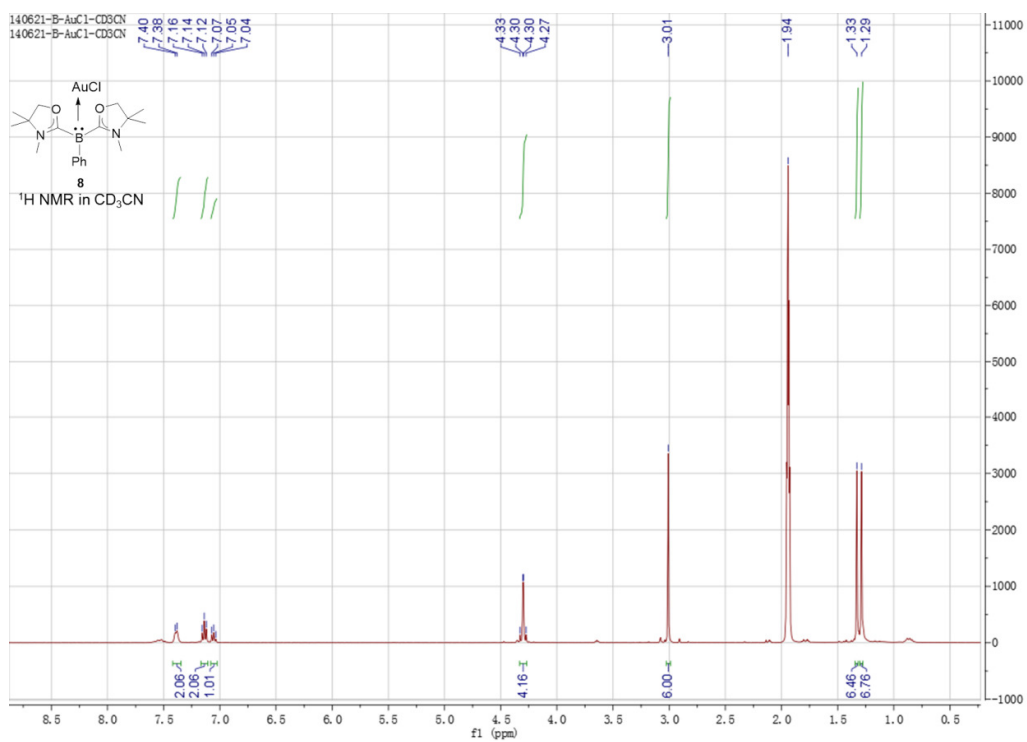

Supplementary Fig. 21  $^1\text{H NMR}$  spectrum of **8**.

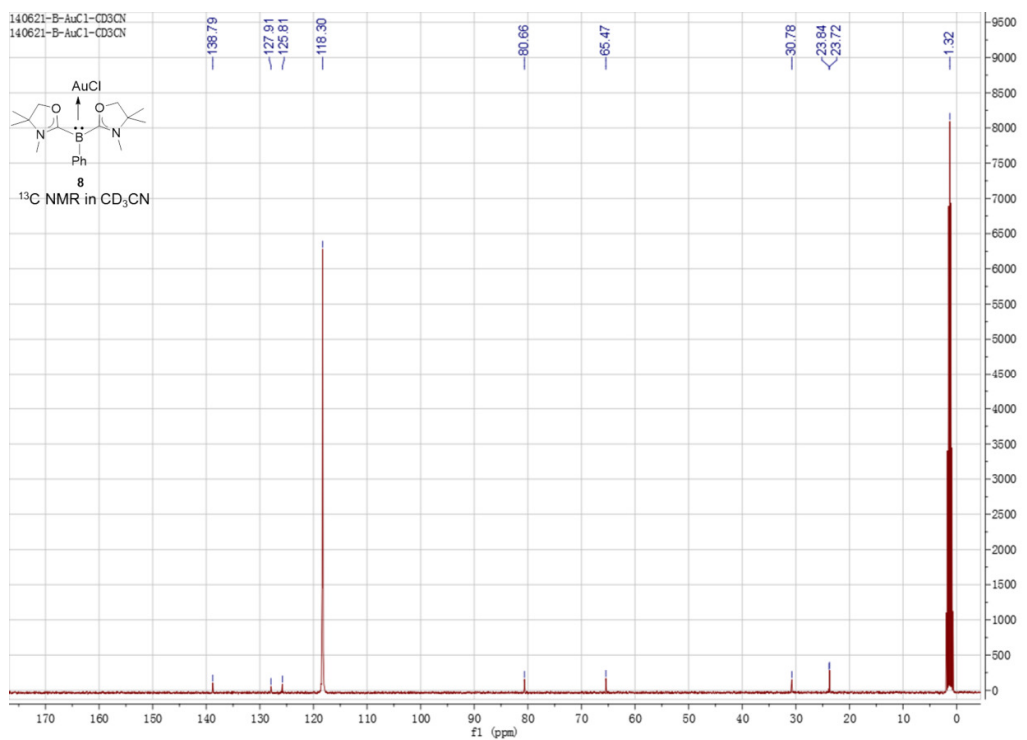

Supplementary Fig. 22  $^{13}\text{C NMR}$  spectrum of **8**.

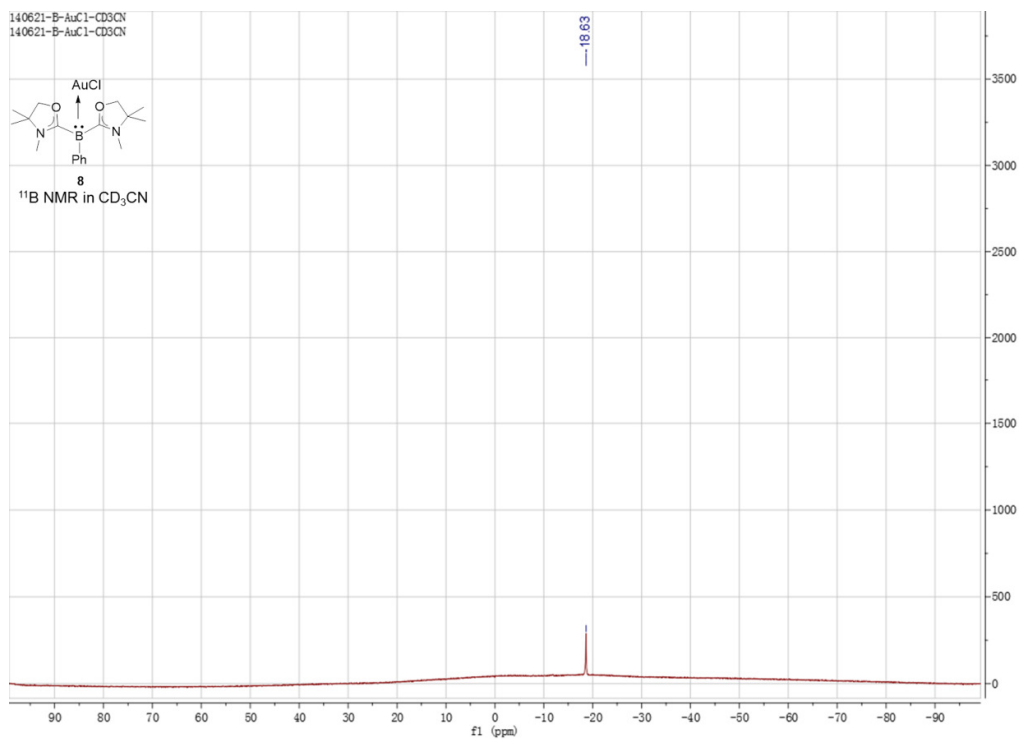

Supplementary Fig. 23 <sup>11</sup>B NMR spectrum of **8**.

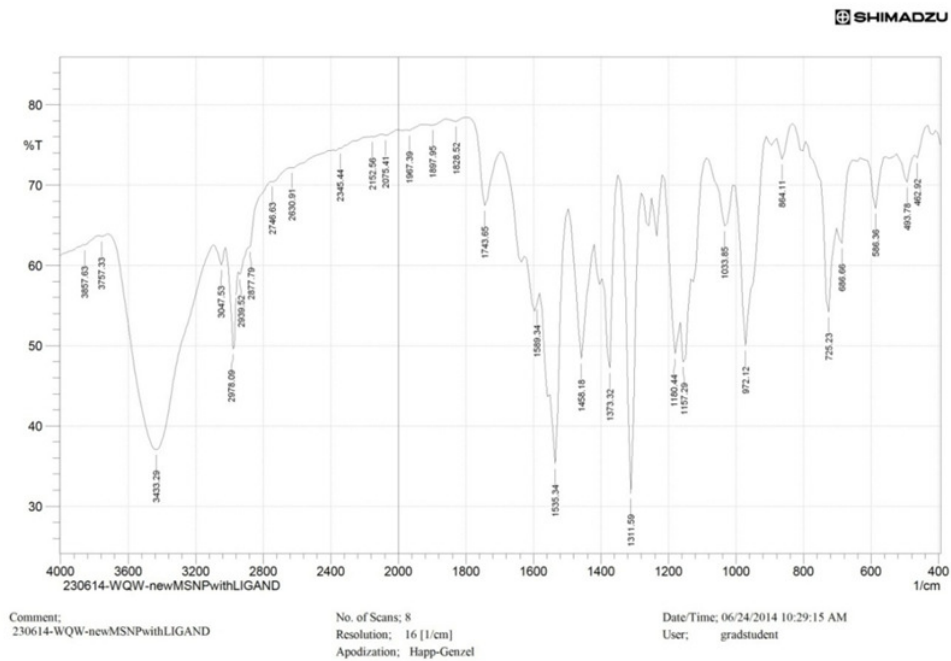

Supplementary Fig. 24 IR spectrum of compound **8**.

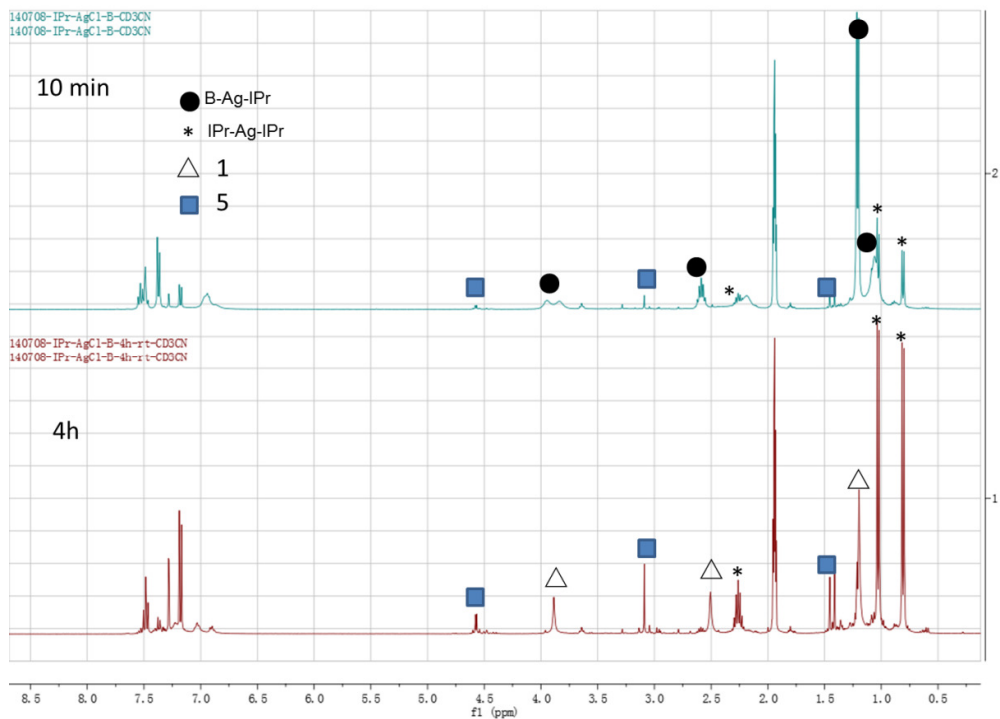

**Supplementary Fig. 25** Reaction of **1** with (IPr)AgCl monitored by  $^1\text{H}$  NMR ( $\text{CD}_3\text{CN}$ ).

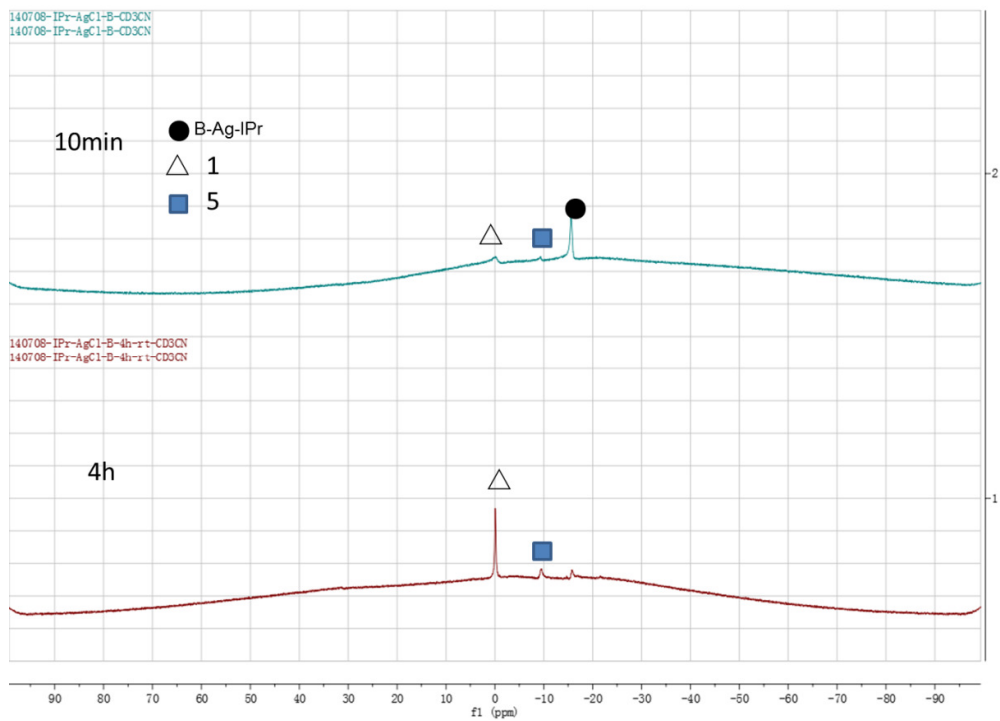

**Supplementary Fig. 26** Reaction of **1** with (IPr)AgCl monitored by  $^{11}\text{B}$  NMR ( $\text{CD}_3\text{CN}$ ).

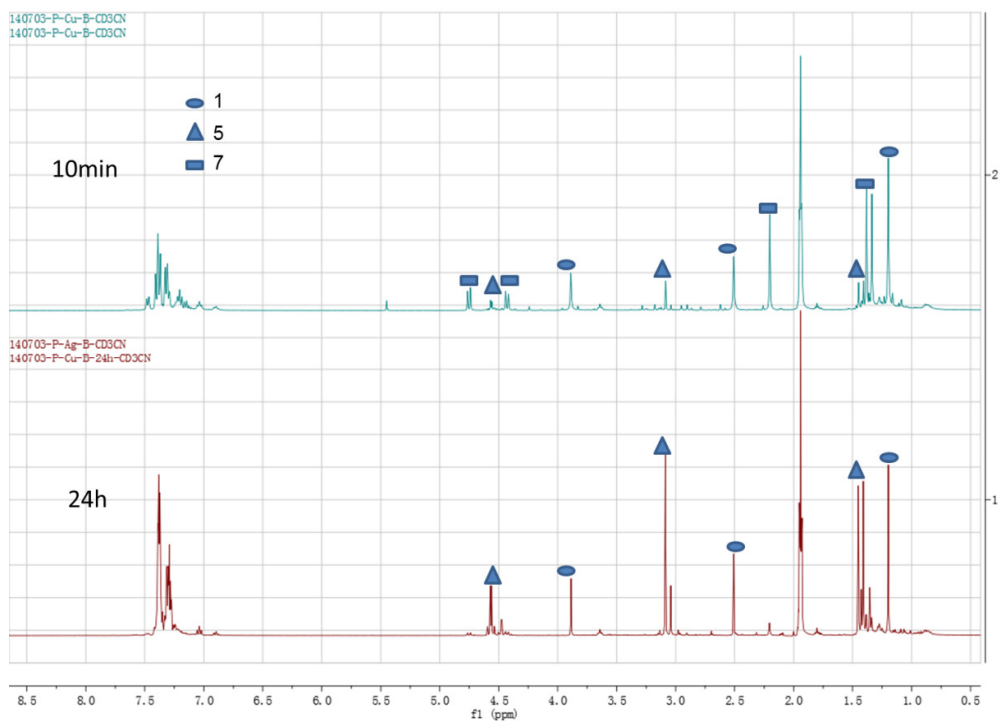

**Supplementary Fig. 27** Reaction of **1** with (Ph<sub>3</sub>P)CuCl monitored by <sup>1</sup>H NMR (CD<sub>3</sub>CN).

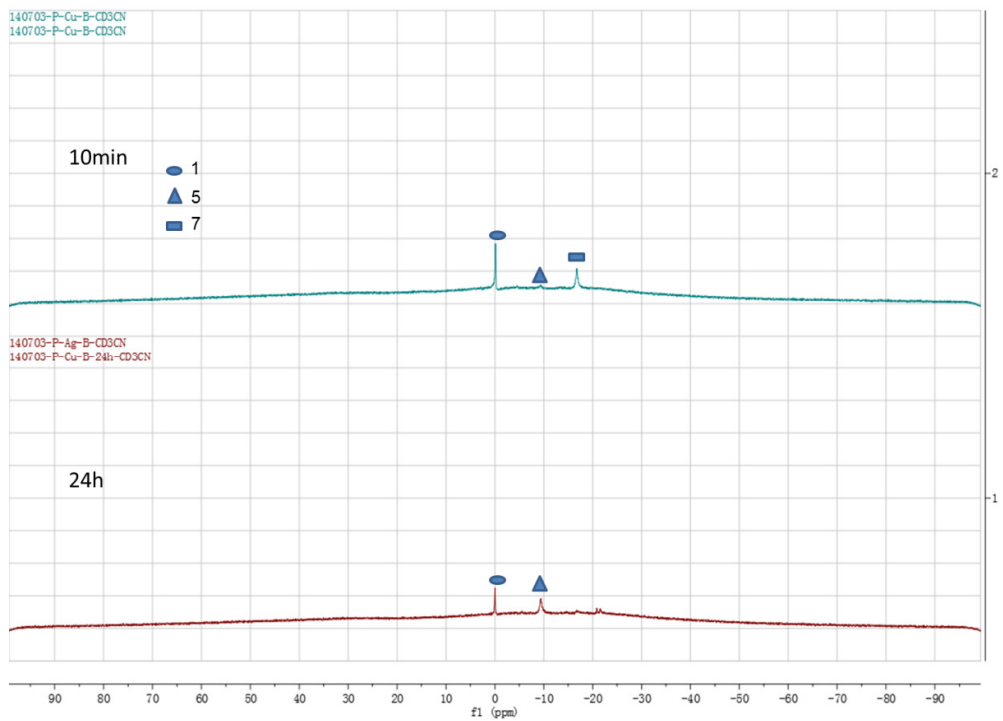

**Supplementary Fig. 28** Reaction of **1** with (Ph<sub>3</sub>P)CuCl monitored by <sup>11</sup>B NMR (CD<sub>3</sub>CN).

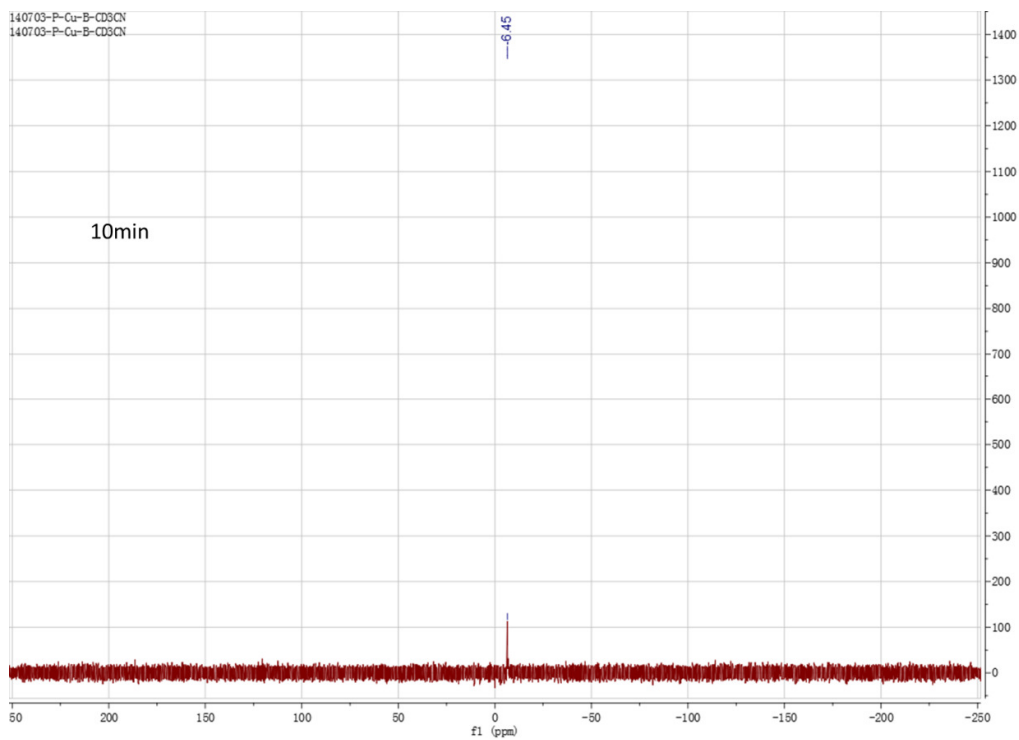

**Supplementary Fig. 29** Reaction of **1** with  $(\text{Ph}_3\text{P})\text{CuCl}$  monitored by  $^{31}\text{P}$  NMR ( $\text{CD}_3\text{CN}$ ).

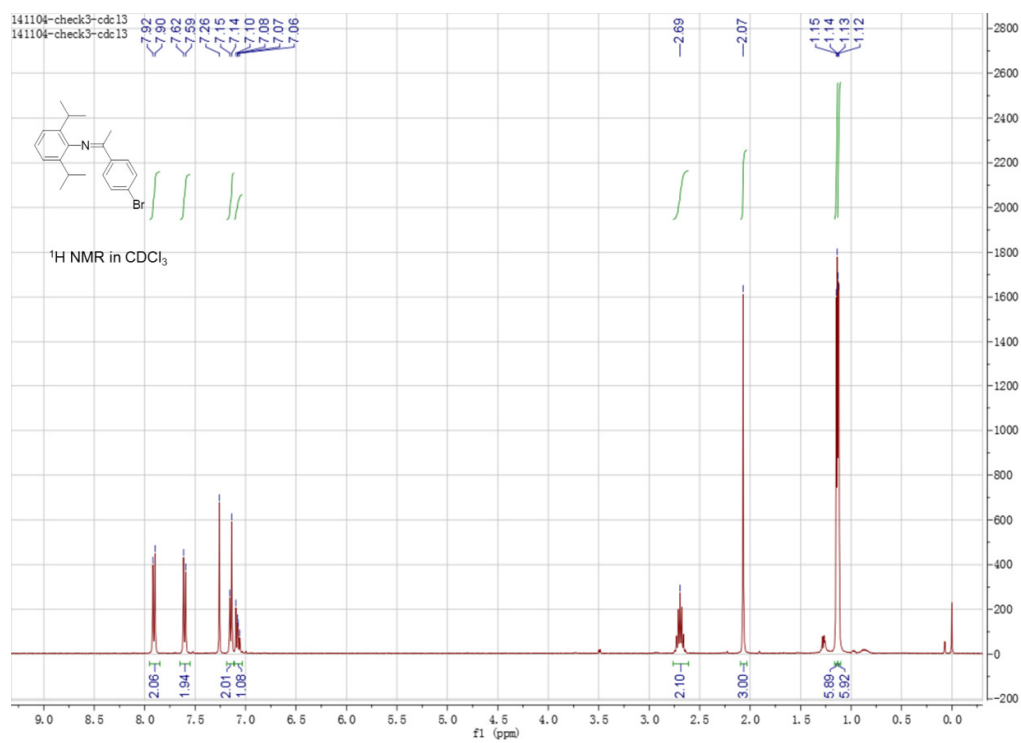

**Supplementary Fig. 30**  $^1\text{H}$  NMR spectrum of **11ec**.

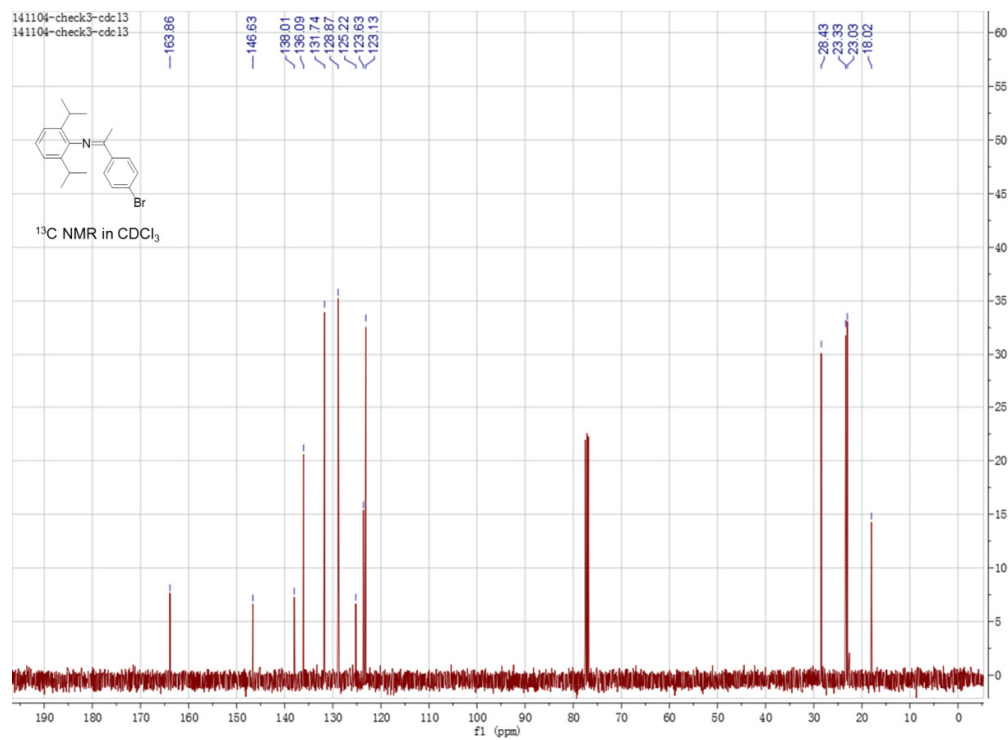

**Supplementary Fig. 31**  $^{13}\text{C}$  NMR spectrum of **11ec**.

### Control experiments:

To investigate the stability of compound **8** during the catalysis reaction, the catalytic reaction between phenylacetylene and aniline with 20 mol% of **8** was monitored by the  $^{11}\text{B}$  NMR spectroscopy. A major signal was observed at  $-16.6$  ppm, in addition to the peak at  $-16.8$  ppm for  $\text{B}(\text{C}_6\text{F}_5)_4$  and a minor peak at  $-19.3$  ppm (Supplementary Fig. 32d). The major peak corresponds to neither free  $\text{L}_2\text{PhB}$ : **1** ( $^{11}\text{B}$  NMR:  $\delta = -1.1$ ) nor **5** ( $^{11}\text{B}$  NMR:  $\delta = -11.2$ ), potential decomposed products from **8**, supporting no decomposition of the B-Au bond. These signals remained until the catalytic reaction completed (Supplementary Fig. 32e). Meanwhile, in a stoichiometric reaction of **8** with aniline ( $\text{PhNH}_2$ ), the aniline complex  $[(\text{L}_2\text{PhB})\text{Au}(\text{NH}_2\text{Ph})]\text{B}(\text{C}_6\text{F}_5)_4$  **S1** was formed, and the  $^{11}\text{B}$  NMR peak appeared at  $-20.1$  ppm (Supplementary Fig. 32b), indicating that this species is not the resting state of the catalyst. The reaction of **8** and alkyne ( $\text{HC}\equiv\text{CPh}$ ) in the presence of  $\text{NEt}_3$  afforded a  $^{11}\text{B}$  NMR chemical shift at  $-16.6$  ppm, in addition to a peak at  $-20.2$  ppm for  $[(\text{L}_2\text{PhB})\text{Au}(\text{NEt}_3)]\text{B}(\text{C}_6\text{F}_5)_4$  **S2**, which presumably corresponds to either  $(\text{L}_2\text{PhB})\text{Au}(\text{C}\equiv\text{CPh})$  or  $\sigma,\pi$ -acetylide complex  $[(\text{L}_2\text{PhB})\text{Au}]_2(\text{C}\equiv\text{CPh})\cdot\text{B}(\text{C}_6\text{F}_5)_4$ , proposing the resting state of the catalyst **S3** (Supplementary Fig. 32c).<sup>16</sup> Although further analysis is required, a peak at  $-19.3$  ppm was tentatively assigned to phenylethenyl-gold complex **S4** (Supplementary Fig. 32d-e).

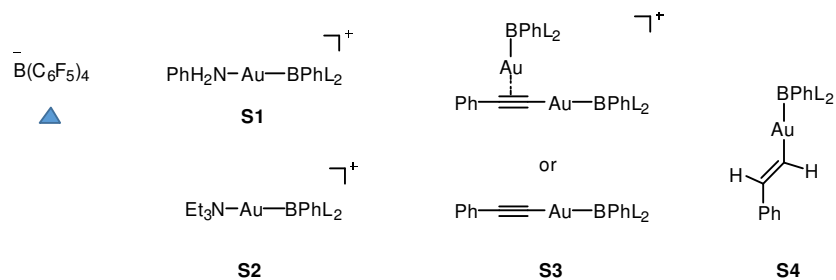



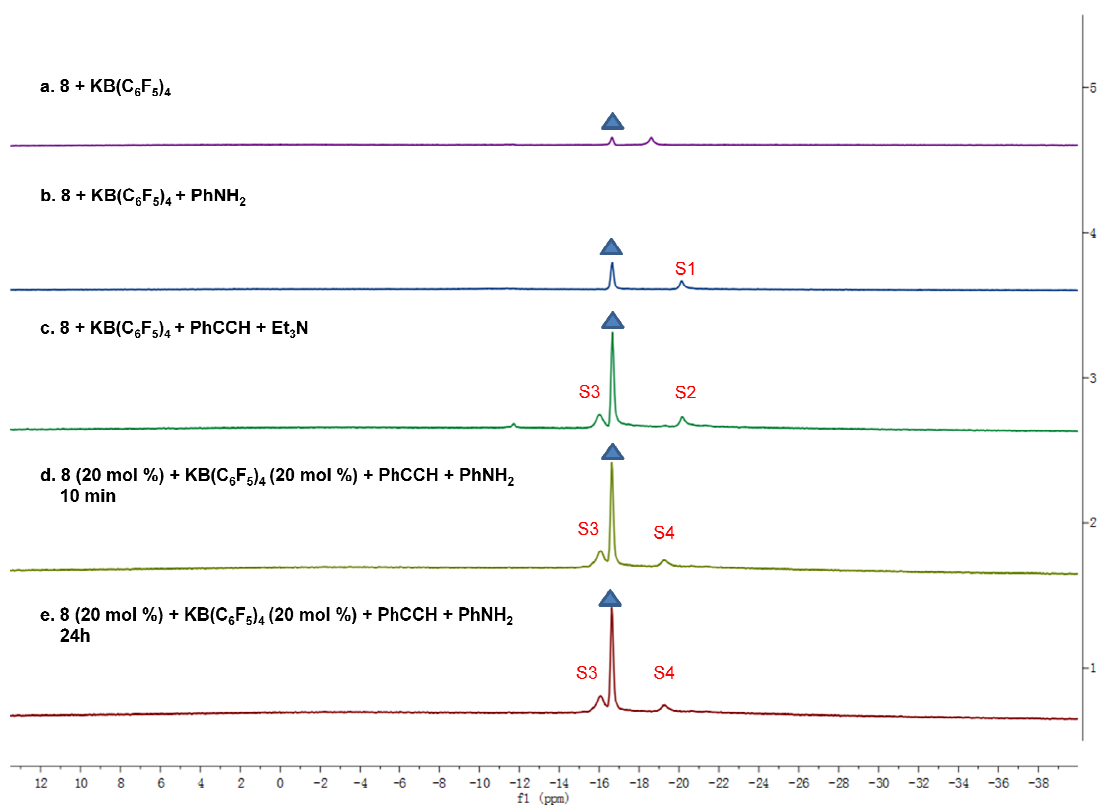

**Supplementary Fig. 32.** Comparison of the  $^{11}\text{B}$  NMR spectra of the control experiments.

2

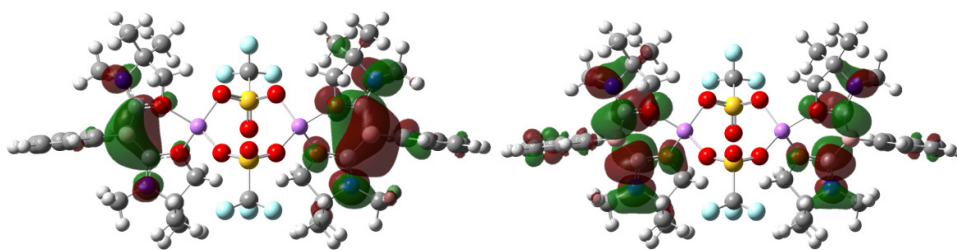

**HOMO (-5.355)**

**LUMO (0.0346)**

3

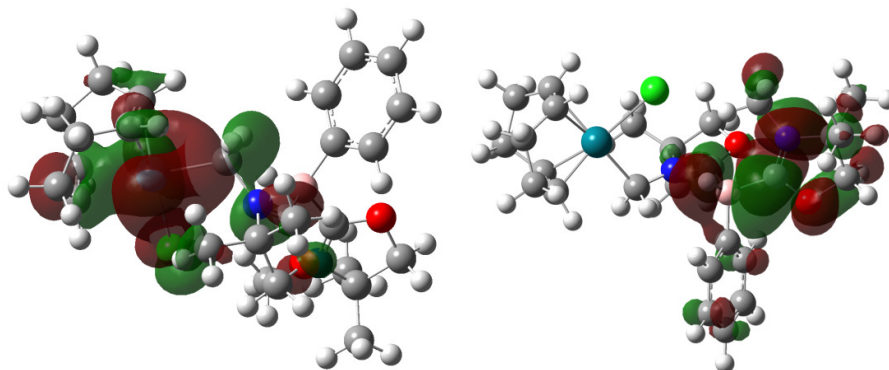

**HOMO (-4.804)**

**LUMO (0.338)**

4

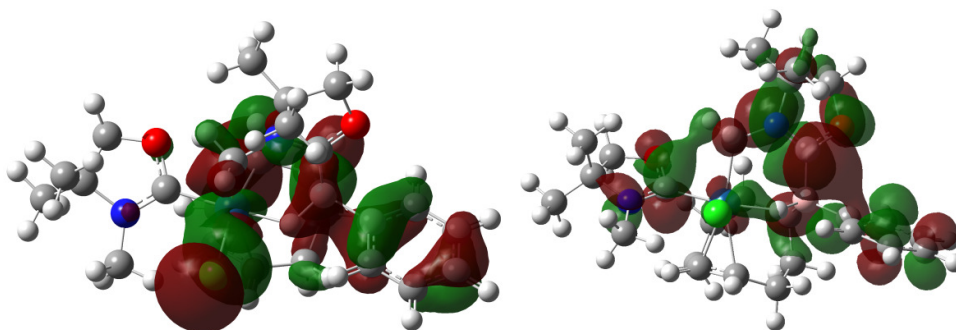

**HOMO (-7.043)**

**LUMO (0.839)**

6

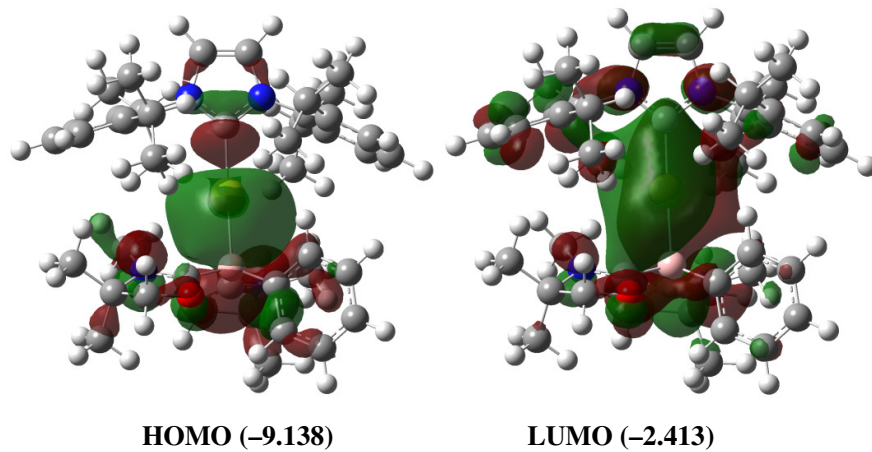

8

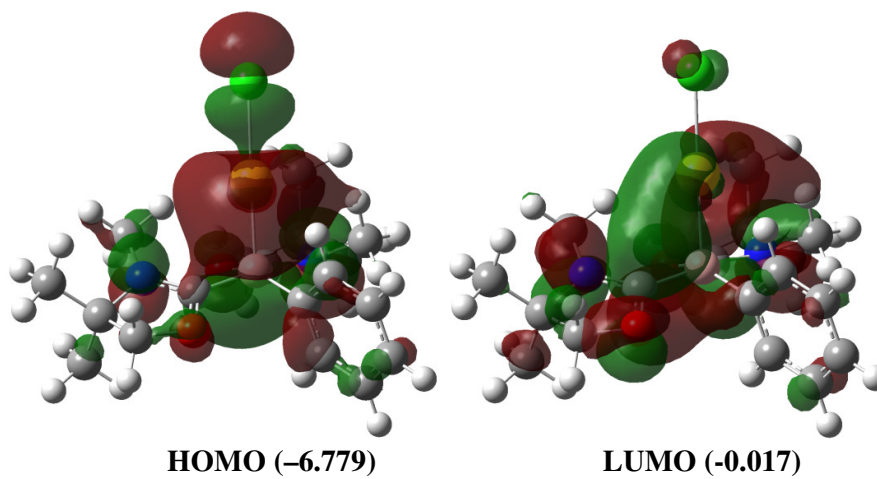

**Supplementary Fig. 33** Plots of the frontier orbitals of compounds 2, 3, 4, 6 and 8.

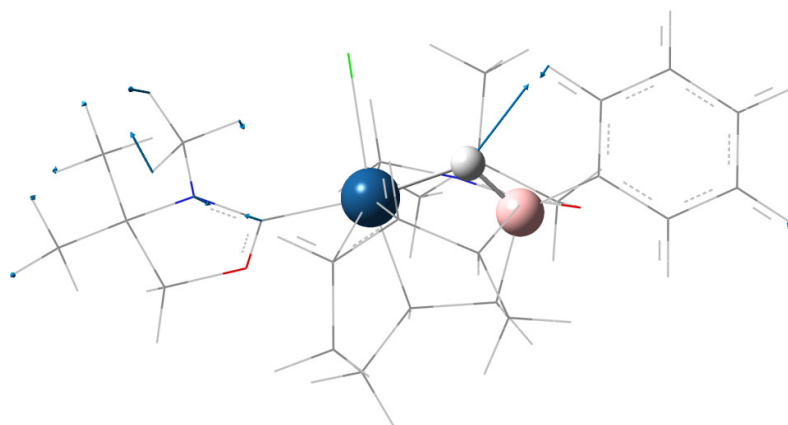

**4: # 167(1589.55 cm<sup>-1</sup>)**

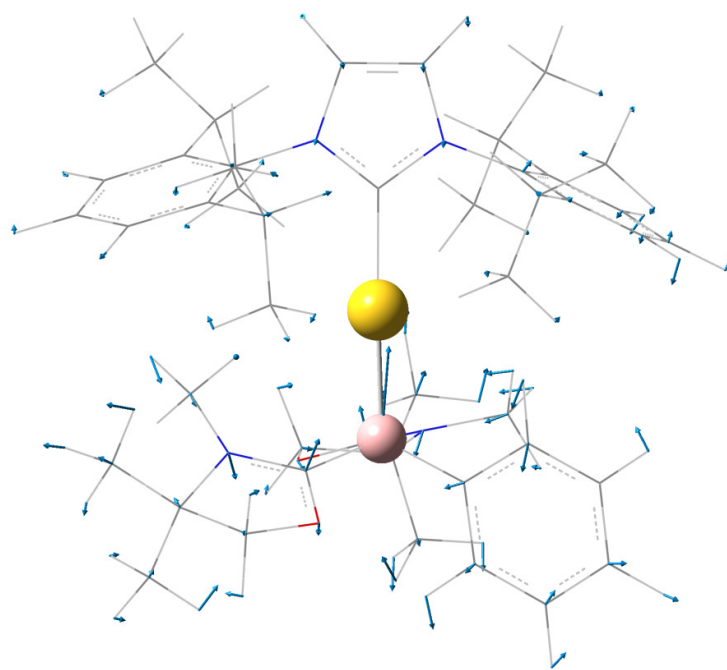

**6: # 89(581.91 cm<sup>-1</sup>)**

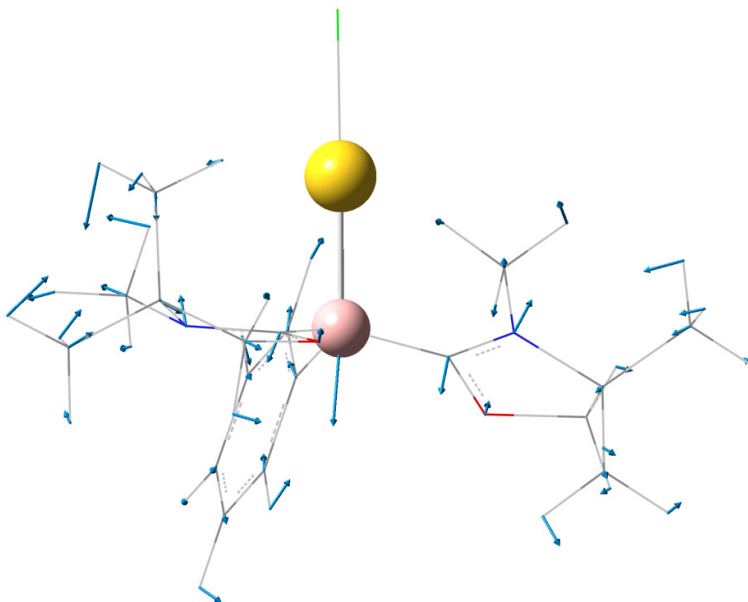

**8: # 41 (577.36 cm<sup>-1</sup>)**

**Supplementary Fig. 34** Frequency calculation results of **4**, **6** and **8**. The picture displays that the vibration mode involves Ir-H-B bending vibration in **4**, and Au-B stretching in **6** and **8**.

**Supplementary Note 1** Coordinates for optimized geometries.

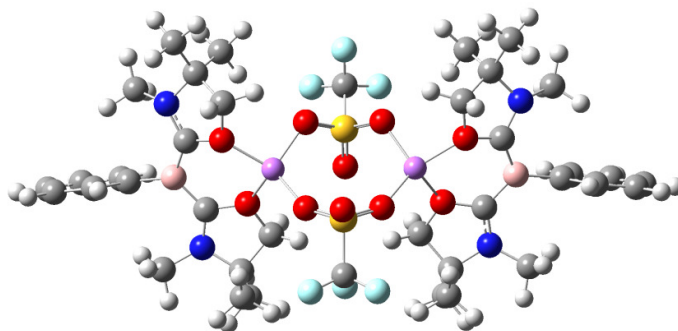

**2**

**2**

|   |             |             |             |
|---|-------------|-------------|-------------|
| B | -5.52225024 | -0.04103128 | -0.30921150 |
| C | -5.09765552 | 1.20025678  | 0.40510858  |
| C | -4.76355165 | 3.43201014  | 0.98892156  |
| C | -3.88239415 | 2.53140315  | 1.83547025  |
| C | -6.72888915 | 2.80908846  | -0.46559122 |
| C | -5.44154230 | 4.50284205  | 1.82920913  |
| C | -3.96518572 | 4.03129072  | -0.17125257 |
| C | -4.49173203 | -1.10935917 | -0.51617520 |
| C | -3.37796574 | -3.13424275 | -0.86694394 |
| C | -2.39897594 | -1.97288133 | -0.88921511 |

|   |             |             |             |
|---|-------------|-------------|-------------|
| C | -6.99755254 | -0.20832402 | -0.88365407 |
| C | -7.25075555 | -0.22700502 | -2.26082817 |
| C | -8.53680766 | -0.38062203 | -2.76714421 |
| C | -9.61493873 | -0.51550004 | -1.89950715 |
| C | -9.39269672 | -0.49672904 | -0.52747204 |
| C | -8.10088960 | -0.34783003 | -0.03341900 |
| C | -0.00053100 | 2.78061921  | -1.74531913 |
| F | -1.08343008 | 2.66898120  | -2.50876719 |
| F | -0.00077500 | 3.98203230  | -1.17302809 |
| F | 1.08154108  | 2.66994720  | -2.51001819 |

|    |             |             |             |
|----|-------------|-------------|-------------|
| C  | -5.91086140 | -3.06935305 | -0.95406642 |
| C  | -3.15234593 | -4.08024275 | -2.03626118 |
| C  | -3.32679876 | -3.86263078 | 0.47748930  |
| O  | -3.93145330 | 1.27475410  | 1.13629209  |
| O  | -3.15278024 | -0.90810307 | -0.27863402 |
| O  | -1.23440410 | 1.76260813  | 0.29750802  |
| O  | 1.23710110  | 1.76381313  | 0.29565302  |
| O  | 0.00097100  | 0.20035402  | -1.16934709 |
| S  | 0.00090700  | 1.47273711  | -0.45632603 |
| F  | -1.08120708 | -3.48685626 | 3.28710225  |
| O  | -1.23130610 | -0.88837607 | 1.91305115  |
| Li | 2.29391417  | 0.30100002  | 0.92297307  |
| C  | 0.00059200  | -3.01508023 | 2.67993520  |
| C  | 3.96465830  | 4.03128031  | -0.16748701 |
| S  | -0.00081700 | -1.17651009 | 2.67579821  |
| O  | 3.15294524  | -0.90899407 | -0.27723602 |
| O  | 3.93215530  | 1.27335510  | 1.13849308  |
| O  | 1.23057010  | -0.88615507 | 1.91534015  |
| F  | 1.08263708  | -3.48534927 | 3.28784625  |
| F  | 0.00134200  | -3.46873827 | 1.41398611  |
| C  | 4.76374337  | 3.43097926  | 0.99166907  |
| O  | -0.00240800 | -0.77075506 | 4.06417331  |
| C  | 3.88313330  | 2.52974019  | 1.83817114  |
| C  | 4.49181134  | -1.10973408 | -0.51578204 |
| C  | 2.39904518  | -1.97345315 | -0.88821207 |
| C  | 5.09768339  | 1.19959809  | 0.40623903  |
| C  | 5.44231543  | 4.50115634  | 1.83235714  |
| N  | 5.71591742  | 2.41169019  | 0.50246604  |
| B  | 5.52213642  | -0.04114800 | -0.30909902 |
| N  | 4.63534535  | -2.36981418 | -1.00237207 |
| C  | 6.72779952  | 2.80927421  | -0.46498804 |
| C  | 6.99709756  | -0.20786002 | -0.88456107 |
| C  | 8.10099760  | -0.34713303 | -0.03501900 |
| C  | 7.24950458  | -0.22618402 | -2.26188917 |
| C  | 8.53531665  | -0.37925003 | -2.76898321 |
| H  | 6.41567750  | -0.11760201 | -2.94549822 |
| C  | 9.61400674  | -0.51392604 | -1.90201514 |
| H  | 8.69791467  | -0.38923703 | -3.83894329 |
| C  | 9.39256274  | -0.49548604 | -0.52984504 |
| H  | 10.61622379 | -0.63098805 | -2.29176317 |
| H  | -2.84536622 | 2.85212922  | 1.88027914  |
| H  | -4.29834933 | 2.38389318  | 2.83336921  |
| H  | -6.37834050 | 2.65288820  | -1.48859611 |

|    |              |             |             |
|----|--------------|-------------|-------------|
| Li | -2.29388117  | 0.30142602  | 0.92214407  |
| N  | -5.71607543  | 2.41226318  | 0.50122304  |
| N  | -4.63526735  | -2.36973218 | -1.00215608 |
| H  | -4.68500636  | 5.10381539  | 2.33580718  |
| H  | -6.08910449  | 4.04350831  | 2.57516320  |
| H  | -3.42964226  | 3.24596325  | -0.70612306 |
| H  | -3.23444125  | 4.74657736  | 0.20866602  |
| H  | -4.62472135  | 4.55117435  | -0.86636006 |
| H  | -1.50324411  | -2.12885016 | -0.29801502 |
| H  | -2.14352616  | -1.66726413 | -1.90415714 |
| H  | -6.37475950  | -2.96350222 | 0.02852300  |
| H  | -5.72947145  | -4.12164732 | -1.15853609 |
| H  | -6.59545250  | -2.68224420 | -1.70268013 |
| H  | -3.83769229  | -4.92683838 | -2.00145915 |
| H  | -2.13722816  | -4.47760034 | -1.99333615 |
| H  | -3.28807525  | -3.55341627 | -2.97996423 |
| H  | -3.39931126  | -3.14587224 | 1.29655610  |
| H  | -2.38394218  | -4.40088133 | 0.57416005  |
| H  | -4.14285932  | -4.58046835 | 0.56272204  |
| H  | -6.41735546  | -0.11831601 | -2.94493523 |
| H  | -8.70002069  | -0.39088803 | -3.83700429 |
| H  | -10.61734178 | -0.63299505 | -2.28864218 |
| H  | -10.22472777 | -0.60218204 | 0.15651901  |
| H  | -7.93715358  | -0.34020903 | 1.03763708  |
| H  | 3.42869826   | 3.24643525  | -0.70264105 |
| H  | 2.84605722   | 2.85026022  | 1.88349614  |
| H  | 3.23422725   | 4.74633036  | 0.21347902  |
| H  | 4.62382135   | 4.55166635  | -0.86256306 |
| H  | 4.29945033   | 2.38189518  | 2.83586222  |
| C  | 3.37828026   | -3.13466824 | -0.86724007 |
| H  | 1.50359511   | -2.12998816 | -0.29671002 |
| H  | 2.14302317   | -1.66718113 | -1.90280115 |
| H  | 6.03506448   | 5.17541140  | 1.21479309  |
| H  | 4.68612536   | 5.10160839  | 2.34009018  |
| H  | 6.09053348   | 4.04123431  | 2.57738020  |
| C  | 5.91122045   | -3.06902823 | -0.95620307 |
| H  | 6.37643847   | 2.65341220  | -1.48777111 |
| H  | 6.95154154   | 3.86203430  | -0.31098902 |
| H  | 7.63835460   | 2.23649217  | -0.32165802 |
| H  | 7.93787760   | -0.33974603 | 1.03613708  |
| H  | 10.22503078  | -0.60076605 | 0.15364501  |
| C  | 3.15238324   | -4.07983131 | -2.03717216 |
| C  | 3.32788925   | -3.86404629 | 0.47669604  |

|   |             |             |             |
|---|-------------|-------------|-------------|
| H | -6.95285453 | 3.86182829  | -0.31184002 |
| H | -7.63911461 | 2.23604417  | -0.32124002 |
| H | -6.03486948 | 5.17650640  | 1.21155609  |
| H | 6.37695151  | -2.96218722 | 0.02538500  |
| H | 5.72972143  | -4.12156031 | -1.15933009 |
| H | 6.59429551  | -2.68240521 | -1.70647313 |

|   |            |             |             |
|---|------------|-------------|-------------|
| H | 3.40065626 | -3.14780524 | 1.29619410  |
| H | 2.38522718 | -4.40260934 | 0.57344304  |
| H | 4.14418531 | -4.58171135 | 0.56108704  |
| H | 3.83818229 | -4.92610938 | -2.00349215 |
| H | 2.13748816 | -4.47772934 | -1.99394915 |
| H | 3.28726625 | -3.55218527 | -2.98054123 |

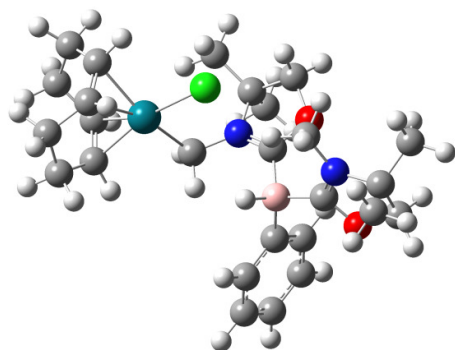

3

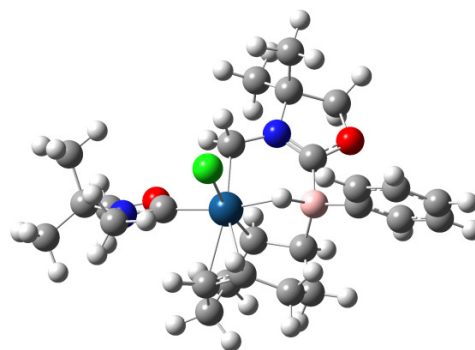

4

3

|   |             |             |             |
|---|-------------|-------------|-------------|
| C | -3.43403198 | 1.35297049  | -1.07981298 |
| H | -2.73520843 | 2.18058999  | -1.15194697 |
| C | -3.98965670 | 1.09450497  | 0.18474850  |
| H | -3.66708402 | 1.73488708  | 0.99792749  |
| C | -5.35547823 | 0.45119148  | 0.38712886  |
| H | -6.01096623 | 0.72057567  | -0.44068803 |
| H | -5.81555139 | 0.87109756  | 1.28236082  |
| C | -5.27258851 | -1.07766892 | 0.54687175  |
| H | -5.05984068 | -1.30312713 | 1.59312099  |
| H | -6.24011601 | -1.53804206 | 0.31788120  |
| C | -4.17370521 | -1.71630591 | -0.27273958 |
| H | -3.72149932 | -2.60321417 | 0.15393084  |
| C | -3.87263032 | -1.42316472 | -1.57701085 |
| H | -3.18656336 | -2.08456167 | -2.09216648 |
| C | -4.66219600 | -0.44493933 | -2.42317990 |
| H | -5.69741352 | -0.42971381 | -2.08620382 |
| H | -4.68258414 | -0.80480963 | -3.45238516 |
| C | -4.06180110 | 0.97373843  | -2.40475019 |
| H | -3.27342555 | 1.02671421  | -3.15751934 |
| H | -4.82234132 | 1.70822296  | -2.69485293 |
| C | -0.99353637 | 1.06111915  | 0.44294571  |
| H | -0.48308904 | 1.48273106  | -0.42191037 |

|   |            |             |             |
|---|------------|-------------|-------------|
| H | 0.51233017 | -1.92421723 | 2.65907118  |
| C | 1.21328343 | 0.09530163  | 0.89802663  |
| C | 2.19829465 | 2.07403244  | -0.53676604 |
| C | 1.86694909 | 2.81890100  | -1.67008830 |
| H | 1.43099603 | 2.31207834  | -2.52242946 |
| C | 2.07361822 | 4.19383491  | -1.72330283 |
| H | 1.80511654 | 4.74644929  | -2.61422898 |
| C | 2.61760821 | 4.85801232  | -0.63200898 |
| H | 2.77628353 | 5.92747058  | -0.66773381 |
| C | 2.95392018 | 4.13837768  | 0.50930495  |
| H | 3.37764265 | 4.64766756  | 1.36503035  |
| C | 2.74488296 | 2.76587991  | 0.54893718  |
| H | 3.01906434 | 2.21606324  | 1.44375240  |
| C | 3.34486439 | -0.32950412 | -0.51427561 |
| C | 5.57792032 | -0.64781940 | -0.35194442 |
| H | 5.91600442 | -0.63902746 | 0.68334127  |
| H | 6.37720218 | -0.33255488 | -1.01543648 |
| C | 4.94710392 | -1.98799396 | -0.74701430 |
| C | 5.25851094 | -2.35595436 | -2.19530063 |
| H | 4.70057625 | -3.23879727 | -2.50425747 |
| H | 6.32189803 | -2.57539287 | -2.29561429 |
| H | 5.00545028 | -1.52944270 | -2.85962595 |

|   |             |             |             |
|---|-------------|-------------|-------------|
| H | -1.42219750 | 1.88963574  | 1.01358106  |
| B | 1.94744094  | 0.48389293  | -0.47860781 |
| H | 1.27935222  | 0.08088521  | -1.40119935 |
| C | -0.18237272 | 0.13234551  | 2.71455139  |
| C | -1.57175846 | -0.40390460 | 3.01033738  |
| H | -2.32530343 | 0.36227153  | 2.83240371  |
| H | -1.61431514 | -0.69599733 | 4.06186990  |
| H | -1.79329156 | -1.26330894 | 2.38039084  |
| C | 0.12492264  | 1.38868969  | 3.52878089  |
| H | 1.15100385  | 1.71438832  | 3.35411082  |
| H | -0.00955844 | 1.18320842  | 4.59140130  |
| H | -0.54674341 | 2.19733603  | 3.24348868  |
| C | 0.89973010  | -0.93024993 | 2.88015795  |
| H | 1.40347185  | -0.89339641 | 3.84154995  |

|    |             |             |             |
|----|-------------|-------------|-------------|
| C  | 5.31315723  | -3.10765952 | 0.21560119  |
| H  | 4.99097978  | -2.86054655 | 1.22698009  |
| H  | 6.39396562  | -3.25149714 | 0.21443155  |
| H  | 4.84815788  | -4.04595489 | -0.08486622 |
| C  | 2.45012608  | -2.60649807 | -0.67140118 |
| H  | 1.48980077  | -2.10966605 | -0.77078919 |
| H  | 2.44441599  | -3.18619031 | 0.24989157  |
| H  | 2.60676283  | -3.26617729 | -1.52289816 |
| N  | 0.03647629  | 0.46074892  | 1.28011536  |
| N  | 3.51812910  | -1.61842754 | -0.62255762 |
| O  | 1.86677796  | -0.60325317 | 1.84871426  |
| O  | 4.50040891  | 0.31148490  | -0.46042876 |
| Cl | -0.92846207 | -2.22729036 | -0.05487290 |
| Rh | -2.45793967 | -0.28328199 | -0.23421896 |

4

|    |             |             |             |
|----|-------------|-------------|-------------|
| Ir | -0.48521376 | -0.35130862 | 0.18168652  |
| C  | -2.39184172 | 0.02344401  | -0.08048964 |
| C  | -0.01656343 | -0.34545668 | -1.81955163 |
| C  | -0.25902472 | 1.70405582  | 0.36389735  |
| C  | -0.03731123 | -2.61521652 | 0.21203210  |
| C  | -1.23822050 | -2.44979551 | -0.43750452 |
| Cl | -0.58324610 | -0.41525275 | 2.75025142  |
| B  | 2.03775759  | -0.15132870 | -0.41078136 |
| H  | 1.24389558  | -0.42318569 | 0.59640021  |
| C  | 2.01751080  | 1.44303664  | -0.48797176 |
| C  | 3.45070506  | -0.64889560 | 0.16727491  |
| C  | 1.46044038  | -0.79189584 | -1.79684204 |
| N  | 1.01934065  | 2.20508330  | -0.16502419 |
| H  | -1.03309432 | 2.24136182  | -0.18225176 |
| H  | -0.30819277 | 1.97287245  | 1.42030579  |
| O  | 3.06877919  | 2.13622285  | -0.91281957 |
| C  | 2.67363392  | 3.52138243  | -1.04842845 |
| C  | 1.39678417  | 3.63912545  | -0.20961111 |
| H  | 2.48620990  | 3.70810215  | -2.10597910 |
| H  | 3.48847535  | 4.14315453  | -0.69012454 |
| C  | 0.33427814  | 4.48729118  | -0.88916056 |
| C  | 1.69037762  | 4.12077225  | 1.20859177  |
| H  | 0.04901107  | 4.04952560  | -1.84577189 |
| H  | 0.72511819  | 5.49086971  | -1.06158087 |
| H  | -0.55098744 | 4.57160687  | -0.26059370 |
| H  | 0.80041634  | 4.04094347  | 1.83069038  |

|   |             |             |             |
|---|-------------|-------------|-------------|
| H | -4.41306459 | 0.19655404  | -2.03945085 |
| H | -4.50075277 | 1.88854174  | -1.46288789 |
| C | -4.96556373 | 1.52358940  | 1.08147855  |
| C | -5.90182120 | -0.53981024 | -0.03741370 |
| H | -5.17981941 | 1.15422958  | 2.08308287  |
| H | -5.82659347 | 2.09884441  | 0.73881364  |
| H | -4.09601094 | 2.17960903  | 1.13318757  |
| H | -5.65316504 | -1.40596993 | -0.65110305 |
| H | -6.71367144 | 0.00795235  | -0.51716579 |
| H | -6.25744053 | -0.88427980 | 0.93313130  |
| C | 3.64136132  | -0.91056365 | 1.52799202  |
| C | 4.55146408  | -0.79996265 | -0.68164974 |
| C | 4.87791627  | -1.31321303 | 2.02054138  |
| H | 2.80234362  | -0.80706254 | 2.20838482  |
| C | 5.95786779  | -1.45878086 | 1.15824676  |
| H | 4.99730299  | -1.51552195 | 3.07687449  |
| C | 5.79165200  | -1.19888145 | -0.19710426 |
| H | 6.92064409  | -1.77398905 | 1.53796013  |
| H | 6.62738163  | -1.30968399 | -0.87587306 |
| H | 4.43615159  | -0.59790663 | -1.74048199 |
| C | -0.96572497 | -1.20843755 | -2.65833224 |
| H | -0.06936592 | 0.67496415  | -2.21277732 |
| C | 1.65058562  | -2.31405832 | -1.77953222 |
| H | 1.99131706  | -0.41209428 | -2.67977191 |
| C | 1.26482871  | -2.99740005 | -0.45812586 |
| H | 2.70988411  | -2.52834333 | -1.93517245 |



|   |             |             |             |
|---|-------------|-------------|-------------|
| H | 2.00752555  | 5.16428049  | 1.18602502  |
| H | 2.48164450  | 3.51827590  | 1.65567893  |
| C | -3.56837721 | -1.26896040 | 1.69251877  |
| N | -3.49116225 | -0.37133221 | 0.55086136  |
| H | -4.14564359 | -2.15455554 | 1.42508263  |
| H | -4.05237183 | -0.75737326 | 2.52331651  |
| H | -2.56503430 | -1.52681364 | 2.01142086  |
| O | -2.74718997 | 0.88945661  | -1.05409573 |
| C | -4.17521456 | 0.88068845  | -1.22254747 |
| C | -4.69441253 | 0.37164743  | 0.11526663  |

|   |             |             |             |
|---|-------------|-------------|-------------|
| H | 1.12618370  | -2.76557341 | -2.62305012 |
| H | 1.22594800  | -4.08078854 | -0.62044860 |
| H | 2.06486272  | -2.82790103 | 0.26084745  |
| H | -0.07585371 | -2.81737920 | 1.27636246  |
| C | -1.40046806 | -2.51005659 | -1.94593738 |
| H | -2.13364277 | -2.60887047 | 0.14505600  |
| H | -2.44821899 | -2.71619073 | -2.17059299 |
| H | -0.83636345 | -3.36652732 | -2.31694870 |
| H | -0.51919714 | -1.44418257 | -3.63032217 |
| H | -1.85711096 | -0.61437390 | -2.86186551 |

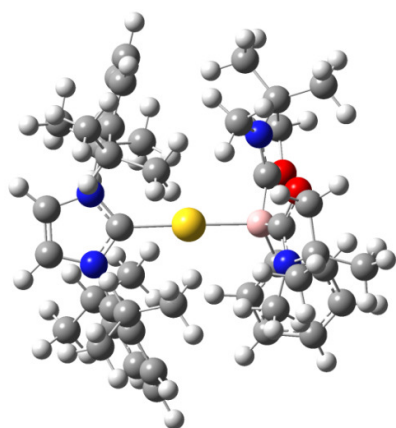

6

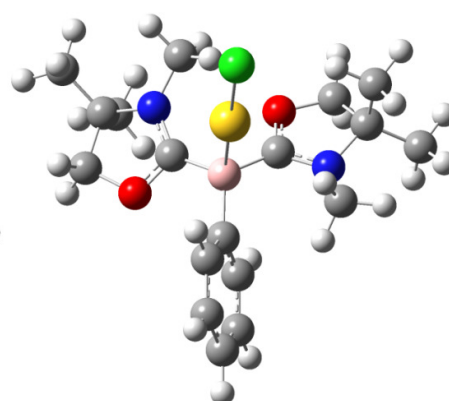

8

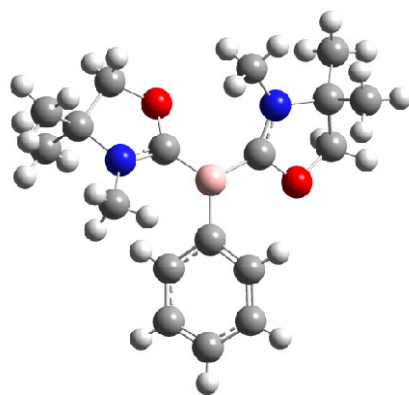

1

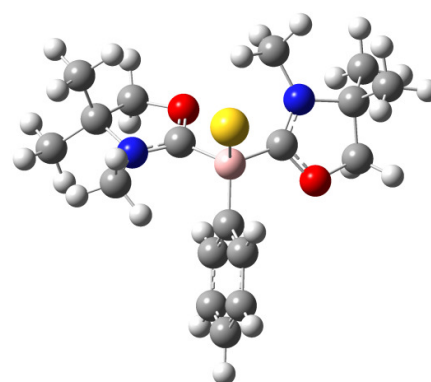

[1·Au]<sup>+</sup>

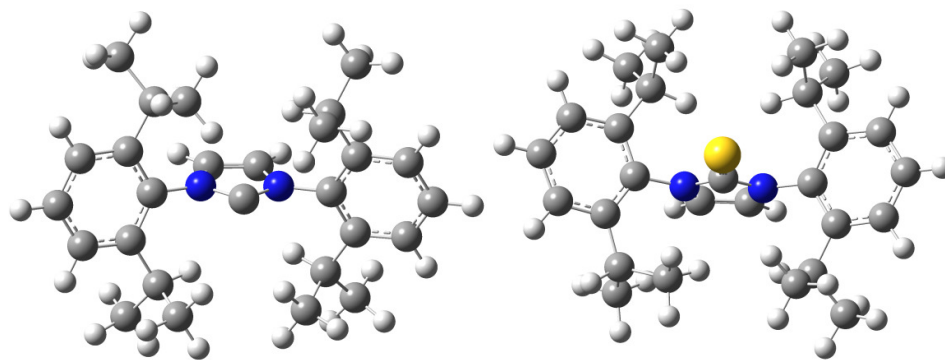

**IPr**

**[IPr·Au]<sup>+</sup>**

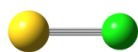

**AuCl**

**6**

|    |             |             |             |
|----|-------------|-------------|-------------|
| Au | 0.00648907  | 0.09183318  | -0.08808482 |
| B  | -1.86403834 | -0.96183810 | -0.44585744 |
| C  | 1.78173956  | 1.13871704  | 0.14300360  |
| C  | 3.94550379  | 1.70430857  | 0.42935068  |
| C  | 3.25166212  | 2.84735654  | 0.22015863  |
| C  | 0.81289388  | 3.34258903  | -0.20568564 |
| C  | 0.03074314  | 3.73335437  | 0.88409466  |
| C  | 0.40672509  | 3.40224234  | 2.31664309  |
| C  | 0.65408484  | 4.68551229  | 3.11726125  |
| C  | -0.66001411 | 2.53630956  | 2.99265003  |
| C  | -1.11778904 | 4.47287157  | 0.61033216  |
| C  | -1.45495318 | 4.80571645  | -0.69321576 |
| C  | -0.63860095 | 4.42775472  | -1.74966323 |
| C  | 0.52029140  | 3.68762774  | -1.52862607 |
| C  | 1.39630307  | 3.25174105  | -2.68887908 |
| C  | 1.67290950  | 4.40343592  | -3.65940670 |
| C  | 0.76648570  | 2.06398732  | -3.42577168 |
| C  | 3.34347777  | -0.72411748 | 0.50713893  |
| C  | 3.43058737  | -1.27871913 | 1.78883365  |
| C  | 3.11976206  | -0.46629997 | 3.03160157  |
| C  | 1.65570872  | -0.68669270 | 3.43765853  |
| C  | 4.05668056  | -0.78504515 | 4.19859375  |
| C  | 3.76315272  | -2.62803634 | 1.88051206  |
| C  | 3.99993687  | -3.38194203 | 0.73873763  |
| C  | 3.89428173  | -2.80492096 | -0.51732962 |

|   |             |             |             |
|---|-------------|-------------|-------------|
| C | -1.02995069 | -3.83526881 | -2.70303950 |
| C | -0.56315928 | -4.49138234 | -1.40885898 |
| C | -1.58451250 | -5.49875700 | -0.88483508 |
| C | 0.82175612  | -5.10438891 | -1.53512797 |
| C | 0.14059094  | -3.26442812 | 0.72342364  |
| N | 1.93221763  | 2.47422805  | 0.04202247  |
| N | 3.02328121  | 0.67178686  | 0.38399187  |
| N | -3.09591279 | -0.18376940 | 1.70202141  |
| N | -0.57386724 | -3.28840362 | -0.53939333 |
| O | -2.35830018 | -2.23901612 | 1.69730355  |
| O | -1.76879303 | -2.67821904 | -2.25193944 |
| H | 4.99068873  | 1.52773585  | 0.60636080  |
| H | 3.56790708  | 3.87354405  | 0.17694874  |
| H | 1.33466820  | 2.83069611  | 2.30736325  |
| H | 1.41954161  | 5.30129398  | 2.64571696  |
| H | 0.98059084  | 4.44114918  | 4.12839906  |
| H | -0.25678456 | 5.28031662  | 3.19219992  |
| H | -1.61295439 | 3.06575581  | 3.04219495  |
| H | -0.35397335 | 2.30036981  | 4.01324085  |
| H | -0.80732724 | 1.60342883  | 2.44574069  |
| H | -1.75181362 | 4.79530762  | 1.42567237  |
| H | -2.35443813 | 5.37337633  | -0.88771191 |
| H | -0.90868607 | 4.70817017  | -2.75842241 |
| H | 2.35517814  | 2.92400607  | -2.28714333 |
| H | 2.40466836  | 4.08926553  | -4.40358456 |

|   |             |             |             |
|---|-------------|-------------|-------------|
| C | 3.55796344  | -1.45923598 | -0.66181340 |
| C | 3.43997876  | -0.85083240 | -2.04563035 |
| C | 4.78282724  | -0.89094079 | -2.78192297 |
| C | 2.34675696  | -1.55753449 | -2.85465016 |
| C | -2.89591189 | -0.20552020 | -1.43192946 |
| C | -2.62665537 | 1.01271207  | -2.06121604 |
| C | -3.57846873 | 1.65892300  | -2.84341296 |
| C | -4.83607889 | 1.09672520  | -3.01970461 |
| C | -5.12979104 | -0.11857254 | -2.41171540 |
| C | -4.16920187 | -0.75346930 | -1.63341078 |
| C | -2.44241002 | -1.09664701 | 0.99973905  |
| C | -2.80162819 | -1.99374393 | 3.05127815  |
| C | -3.69398431 | -0.76192991 | 2.92833308  |
| C | -5.15056015 | -1.12895960 | 2.65632908  |
| C | -3.55534598 | 0.15080245  | 4.13711862  |
| C | -3.43359438 | 1.14733293  | 1.21822294  |
| C | -1.37336596 | -2.35090926 | -1.02415740 |
| H | 4.68849277  | -0.41592033 | -3.75871215 |
| H | 5.11305920  | -1.91840562 | -2.93877612 |
| H | 2.62915560  | -2.59111201 | -3.06374470 |
| H | 2.20006645  | -1.05266856 | -3.80975919 |
| H | 1.39982451  | -1.55119337 | -2.31055316 |
| H | -1.66138564 | 1.48154371  | -1.91723646 |
| H | -3.33793348 | 2.60482031  | -3.31186185 |
| H | -5.57928354 | 1.59667426  | -3.62554558 |
| H | -6.10424023 | -0.56946717 | -2.54631052 |
| H | -4.41481510 | -1.70427145 | -1.17100437 |
| H | -1.91918662 | -1.79354425 | 3.66180499  |
| H | -3.32244124 | -2.87862646 | 3.40336001  |
| H | -5.72319715 | -0.23925073 | 2.39442703  |
| H | -5.59815543 | -1.57485341 | 3.54480483  |
| H | -5.21618318 | -1.83853607 | 1.83081543  |
| H | -2.53505105 | 0.52352598  | 4.22455841  |

|   |             |             |             |
|---|-------------|-------------|-------------|
| H | 2.06186898  | 5.27819456  | -3.13900763 |
| H | 0.76982800  | 4.69726434  | -4.19434862 |
| H | 0.61610210  | 1.21577630  | -2.75600771 |
| H | 1.40996419  | 1.75014544  | -4.24926584 |
| H | -0.20399484 | 2.34194122  | -3.84056615 |
| H | 3.24325290  | 0.58892605  | 2.78793517  |
| H | 1.48897389  | -1.74105063 | 3.67002928  |
| H | 0.97904974  | -0.39646046 | 2.63187261  |
| H | 1.41711735  | -0.09804196 | 4.32493743  |
| H | 3.88678495  | -0.07580418 | 5.00843279  |
| H | 5.10214074  | -0.72064687 | 3.89840432  |
| H | 3.87522499  | -1.78284281 | 4.59852258  |
| H | 3.84866131  | -3.09299453 | 2.85236350  |
| H | 4.27595498  | -4.42371417 | 0.83142685  |
| H | 4.08952464  | -3.40092836 | -1.39916612 |
| H | 3.14507430  | 0.19251169  | -1.94224268 |
| H | 5.55669868  | -0.37025740 | -2.21809569 |
| H | -3.80261943 | -0.40970453 | 5.03921830  |
| H | -4.24199695 | 0.99408007  | 4.08016600  |
| H | -2.57679466 | 1.55894901  | 0.68891458  |
| H | -3.65715074 | 1.77384898  | 2.07759982  |
| H | -4.28435508 | 1.11656162  | 0.53898506  |
| H | -0.19526863 | -3.48103402 | -3.30851936 |
| H | -1.69953255 | -4.45276414 | -3.29302459 |
| H | -1.32661830 | -5.81857035 | 0.12437335  |
| H | -1.60109256 | -6.37920141 | -1.52778786 |
| H | -2.58065714 | -5.05562393 | -0.86862659 |
| H | 1.55963163  | -4.34130922 | -1.77935954 |
| H | 0.81092554  | -5.85211241 | -2.32842267 |
| H | 1.11799233  | -5.60229481 | -0.61224703 |
| H | 0.10169186  | -2.25817160 | 1.12721605  |
| H | 1.18185016  | -3.52842067 | 0.54658280  |
| H | -0.31091586 | -3.95437901 | 1.43497187  |

## 8

|    |             |             |             |
|----|-------------|-------------|-------------|
| Au | 0.50930691  | -0.83406308 | -1.18345040 |
| B  | -0.25062795 | 0.67433689  | 0.14868267  |
| C  | 0.68717037  | 0.19145564  | 1.28106509  |
| C  | 2.61057722  | -0.49761574 | 2.36580599  |
| C  | 1.37019643  | -0.96964177 | 3.11696982  |
| C  | 2.76925170  | 1.21264204  | 0.49332490  |
| C  | 3.63518075  | 0.11984332  | 3.30486870  |
| C  | 3.21274773  | -1.61663728 | 1.51700746  |

|   |             |             |             |
|---|-------------|-------------|-------------|
| C | -1.83351877 | -2.10564384 | 0.94974857  |
| C | -4.19558079 | -0.36188641 | 2.30384173  |
| C | -4.71383021 | -1.68489022 | 0.21801954  |
| C | -0.05822984 | 2.19889183  | -0.32493359 |
| C | 0.13402354  | 2.56948478  | -1.65816108 |
| C | 0.30172647  | 3.90052923  | -2.02659775 |
| C | 0.28081801  | 4.90070650  | -1.06293067 |
| C | 0.08169144  | 4.55972585  | 0.27002548  |

|   |             |             |             |
|---|-------------|-------------|-------------|
| C | -1.77890999 | 0.30880596  | 0.34742692  |
| C | -3.87349508 | -0.57289564 | 0.82612624  |
| C | -3.98424584 | 0.72169270  | 0.02964434  |
| N | -2.41754171 | -0.80609422 | 0.67033570  |
| O | 0.27968376  | -0.68633211 | 2.21814563  |
| O | -2.65778141 | 1.27847934  | 0.09081321  |
| H | 1.37508695  | -2.03587532 | 3.32685564  |
| H | 1.20707598  | -0.39941683 | 4.03218664  |
| H | 2.76379713  | 0.65766407  | -0.44915196 |
| H | 3.78443718  | 1.29999423  | 0.87095859  |
| H | 2.36424341  | 2.20421593  | 0.32187840  |
| H | 4.53495915  | 0.41625457  | 2.76745985  |
| H | 3.92960916  | -0.61359045 | 4.05668505  |
| H | 3.21582812  | 0.99247183  | 3.80453169  |
| H | 2.46000640  | -2.05130152 | 0.85666274  |
| H | 3.61607698  | -2.39663356 | 2.16412646  |
| H | 4.02366827  | -1.23706183 | 0.89593911  |
| H | -4.21995111 | 0.53623462  | -1.01873793 |

|    |             |             |             |
|----|-------------|-------------|-------------|
| C  | -0.08953045 | 3.22713802  | 0.62482241  |
| Cl | 1.36999703  | -2.45307495 | -2.67612425 |
| N  | 1.97067098  | 0.51294803  | 1.49133272  |
| H  | -4.67495479 | 1.44192654  | 0.45732569  |
| H  | -0.82858143 | -2.13202969 | 0.53885146  |
| H  | -2.43399846 | -2.86872312 | 0.45956214  |
| H  | -1.79125575 | -2.28880911 | 2.02166749  |
| H  | -3.94045291 | -1.24989871 | 2.88180772  |
| H  | -5.26117382 | -0.16617137 | 2.42885975  |
| H  | -3.63218516 | 0.48571960  | 2.69508504  |
| H  | -4.36741805 | -1.92413757 | -0.78715113 |
| H  | -5.75146972 | -1.35443269 | 0.15971734  |
| H  | -4.68659803 | -2.58500178 | 0.83068393  |
| H  | 0.16734585  | 1.79774543  | -2.41687579 |
| H  | 0.45525065  | 4.15494727  | -3.06708546 |
| H  | 0.41784784  | 5.93550857  | -1.34672969 |
| H  | 0.05924768  | 5.33091991  | 1.02917335  |
| H  | -0.24187715 | 2.97566950  | 1.66920041  |

**1**

|   |          |          |          |
|---|----------|----------|----------|
| B | 0.037912 | 0.338    | 0.023002 |
| C | 1.506144 | 0.104743 | -0.17687 |
| C | 3.580167 | 0.655117 | -0.90861 |
| C | 3.726809 | -0.61084 | -0.07517 |
| C | 4.281332 | -0.27616 | 1.312157 |
| C | 4.55699  | -1.67503 | -0.77556 |
| C | 1.893842 | -2.15351 | 0.747541 |
| C | -0.9098  | -0.81687 | 0.043059 |
| C | -1.68543 | -2.94125 | -0.24783 |
| C | -2.8977  | -2.03153 | -0.07839 |
| C | -3.92364 | -2.62048 | 0.876259 |
| C | -3.52303 | -1.67295 | -1.42744 |
| C | -2.86529 | 0.174051 | 1.218633 |
| C | -0.50245 | 1.830286 | -0.0063  |
| C | -1.55232 | 2.202436 | -0.85757 |
| C | -2.04769 | 3.501209 | -0.89657 |
| C | -1.49069 | 4.482487 | -0.08592 |
| C | -0.43586 | 4.147515 | 0.756155 |
| C | 0.044358 | 2.844603 | 0.791295 |
| N | 2.303159 | -0.98359 | 0.000503 |
| N | -2.19655 | -0.8734  | 0.483812 |
| O | 2.293434 | 1.154067 | -0.55156 |
| O | -0.61678 | -2.03261 | -0.52419 |

|   |            |             |             |
|---|------------|-------------|-------------|
| H | 3.694196   | 0.525653    | 1.761152    |
| H | 5.318851   | 0.050732    | 1.229329    |
| H | 4.254606   | -1.14182    | 1.973549    |
| H | 4.625818   | -2.57852    | -0.16889    |
| H | 5.570419   | -1.30822    | -0.94498    |
| H | 4.106304   | -1.93131    | -1.73364    |
| H | 1.13273    | -1.863      | 1.475788    |
| H | 2.758553   | -2.56092    | 1.268484    |
| H | 1.475327   | -2.91598    | 0.095767    |
| H | -1.47552   | -3.48035    | 0.680844    |
| H | -1.76842   | -3.63361    | -1.08178    |
| H | -4.79943   | -1.977      | 0.958596    |
| H | -3.49061   | -2.75833    | 1.867356    |
| H | -4.25664   | -3.58893    | 0.501214    |
| H | 3.59892300 | -3.84278600 | -0.19636500 |
| H | -4.02891   | -2.53729    | -1.86118    |
| H | -2.74754   | -1.33379    | -2.11513    |
| H | -2.1125    | 0.75281     | 1.747471    |
| H | -3.54732   | -0.27355    | 1.941086    |
| H | -3.41743   | 0.856368    | 0.568334    |
| H | -1.98154   | 1.452707    | -1.51344    |
| H | -2.85915   | 3.750887    | -1.56841    |
| H | -1.86841   | 5.495757    | -0.11429    |

|   |          |          |          |
|---|----------|----------|----------|
| H | 4.323954 | 1.414368 | -0.68169 |
| H | 3.585699 | 0.424695 | -1.97712 |

|   |          |          |          |
|---|----------|----------|----------|
| H | 0.010973 | 4.904482 | 1.38799  |
| H | 0.865341 | 2.600431 | 1.453966 |

**[1•Au]<sup>+</sup>**

|    |             |             |             |
|----|-------------|-------------|-------------|
| B  | 0.00627142  | 0.37334399  | -0.16835130 |
| C  | 1.83020960  | -2.45530511 | -1.93215798 |
| C  | 2.97218831  | -1.96451637 | -1.03986064 |
| N  | 2.35878596  | -0.69697430 | -0.55529041 |
| C  | 1.06178983  | -0.69785644 | -0.72270134 |
| O  | 0.66216464  | -1.73295814 | -1.45126537 |
| C  | -3.40983823 | 0.66065634  | -1.76152659 |
| C  | -3.65990908 | -0.67325721 | -1.05805147 |
| N  | -2.25678698 | -0.98567260 | -0.65826196 |
| C  | -1.49712429 | 0.08006835  | -0.70288548 |
| O  | -2.13315236 | 1.10441713  | -1.23470312 |
| C  | 3.20436981  | -2.88832871 | 0.15202751  |
| C  | 4.24572567  | -1.72076751 | -1.83444428 |
| C  | -4.51134293 | -0.48993020 | 0.19536880  |
| C  | -4.22290046 | -1.73225409 | -1.99132410 |
| C  | -1.91046646 | -2.28361502 | -0.10386735 |
| C  | 3.08554116  | 0.21880824  | 0.31677224  |
| Au | -0.05127056 | -0.02631580 | 1.89149418  |
| C  | 0.45290798  | 1.87218626  | -0.52860240 |
| C  | 0.38784214  | 2.94253939  | 0.36692933  |
| C  | 0.77574175  | 4.22387383  | -0.00897076 |
| C  | 1.23643375  | 4.46464027  | -1.29641741 |
| C  | 1.30036197  | 3.41808826  | -2.20850562 |
| C  | 0.91206826  | 2.14151901  | -1.82420723 |
| H  | 1.97034876  | -2.18015319 | -2.97606302 |
| H  | 1.63122472  | -3.51808269 | -1.83829878 |

|   |             |             |             |
|---|-------------|-------------|-------------|
| H | -3.29128343 | 0.55088833  | -2.83855777 |
| H | -4.14835352 | 1.42163788  | -1.53292533 |
| H | 3.92808882  | -2.45633245 | 0.84236936  |
| H | 2.27104341  | -3.06644702 | 0.68889916  |
| H | 3.59892336  | -3.84278652 | -0.19636500 |
| H | 5.07177666  | -1.43566812 | -1.18519180 |
| H | 4.53274006  | -2.64250478 | -2.34105915 |
| H | 4.09231948  | -0.94409154 | -2.58314660 |
| H | -4.59452775 | -1.41554803 | 0.76283961  |
| H | -4.08549602 | 0.28193965  | 0.83753670  |
| H | -5.51715845 | -0.18716185 | -0.09560606 |
| H | -5.18612261 | -1.39849097 | -2.37697880 |
| H | -3.55169569 | -1.90387634 | -2.83250073 |
| H | -4.38543779 | -2.67245715 | -1.46549728 |
| H | -1.75591166 | -3.00080233 | -0.90667642 |
| H | -1.00732765 | -2.19113118 | 0.49057517  |
| H | -2.72298286 | -2.61807261 | 0.53761012  |
| H | 4.12897251  | 0.22341735  | 0.01546671  |
| H | 2.67499895  | 1.21726518  | 0.21054834  |
| H | 2.99238450  | -0.10613500 | 1.35390292  |
| H | 0.03237606  | 2.77203597  | 1.37501675  |
| H | 0.71815669  | 5.03394802  | 0.70513959  |
| H | 1.54102482  | 5.45986808  | -1.58867743 |
| H | 1.65019035  | 3.59768266  | -3.21596825 |
| H | 0.96306211  | 1.34084753  | -2.55551240 |
|   |             |             |             |

**IPr**

|   |             |             |             |
|---|-------------|-------------|-------------|
| C | 0.67327002  | -0.03128683 | 1.91301524  |
| C | -0.67331618 | 0.03176812  | 1.91299713  |
| N | -1.05584553 | 0.04143953  | 0.57707676  |
| C | -0.00000074 | 0.00019531  | -0.28348385 |
| N | 1.05582412  | -0.04095935 | 0.57708890  |
| C | 2.42552776  | -0.11876962 | 0.16303420  |
| C | -2.42557899 | 0.11887501  | 0.16304798  |
| C | -2.94132722 | 1.35401325  | -0.23494105 |
| C | -4.28220082 | 1.40342058  | -0.61460972 |
| C | -5.07266374 | 0.26708036  | -0.58284323 |
| C | -4.53585365 | -0.94898130 | -0.18278474 |

|   |             |             |             |
|---|-------------|-------------|-------------|
| H | 2.70949907  | 3.17783841  | -1.47318263 |
| H | 1.15312645  | -2.40366316 | 0.22778244  |
| H | 1.05973929  | -3.73106829 | -1.86664985 |
| H | 1.18265648  | -1.99301026 | -2.20117387 |
| H | 2.60530009  | -3.03480931 | -2.37611829 |
| H | 2.04693680  | -4.65913934 | 0.30841519  |
| H | 3.06243870  | -3.62541341 | 1.32441318  |
| H | 3.62064017  | -4.13338948 | -0.27336691 |
| H | -1.77500144 | -2.20923011 | 1.25912344  |
| H | -3.00782339 | -4.25632091 | 1.50923533  |
| H | -4.08503396 | -2.94231704 | 2.00228956  |

|   |             |             |             |
|---|-------------|-------------|-------------|
| C | -3.20017338 | -1.04813769 | 0.19371955  |
| C | 3.20045915  | 1.04801844  | 0.19367465  |
| C | 4.53610952  | 0.94846979  | -0.18282063 |
| C | 5.07255749  | -0.26774852 | -0.58291789 |
| C | 4.28174685  | -1.40383827 | -0.61472067 |
| C | 2.94089830  | -1.35404574 | -0.23500108 |
| C | 2.57213583  | 2.38557503  | 0.53566148  |
| C | 3.55313731  | 3.37928627  | 1.15753216  |
| C | 1.93553339  | 2.97769550  | -0.72942370 |
| C | 2.07497759  | -2.59498169 | -0.32091199 |
| C | 1.70444857  | -2.85438398 | -1.78599270 |
| C | 2.74645713  | -3.82235606 | 0.29990083  |
| C | -2.57144048 | -2.38548762 | 0.53575830  |
| C | -3.55211581 | -3.37956989 | 1.15756156  |
| C | -1.93452236 | -2.97742325 | -0.72925257 |
| C | -2.07573281 | 2.59518017  | -0.32079983 |
| C | -1.70478662 | 2.85446430  | -1.78579999 |
| C | -2.74769323 | 3.82248454  | 0.29961476  |
| H | 1.38568040  | -0.06597786 | 2.71709996  |
| H | -1.38573926 | 0.06647676  | 2.71707262  |
| H | -4.70951246 | 2.34228628  | -0.93848445 |
| H | 1.21436469  | 2.28470445  | -1.16144057 |

|   |             |             |             |
|---|-------------|-------------|-------------|
| H | -4.28545330 | -3.72560900 | 0.42801515  |
| H | -1.42748177 | -3.91599935 | -0.49649089 |
| H | -1.21368285 | -2.28413888 | -1.16134311 |
| H | -2.70837862 | -3.17801492 | -1.47300792 |
| H | -1.15399419 | 2.40421246  | 0.22821336  |
| H | -1.06045892 | 3.73144296  | -1.86636386 |
| H | -1.18248703 | 1.99325468  | -2.20067499 |
| H | -2.60552854 | 3.03437530  | -2.37625938 |
| H | -2.04831260 | 4.65937853  | 0.30837560  |
| H | -3.06407473 | 3.62556293  | 1.32401032  |
| H | -3.62168278 | 4.13336343  | -0.27403431 |
| H | -6.11224403 | 0.32570984  | -0.87566779 |
| H | -5.16331679 | -1.82847663 | -0.17072372 |
| H | 5.16385437  | 1.82776780  | -0.17074844 |
| H | 6.11212074  | -0.32666042 | -0.87574270 |
| H | 4.70871192  | -2.34282151 | -0.93871068 |
| H | 1.77557122  | 2.20959581  | 1.25895386  |
| H | 3.00915930  | 4.25623806  | 1.50918933  |
| H | 4.08583624  | 2.94179793  | 2.00227618  |
| H | 4.28665684  | 3.72505903  | 0.42803880  |
| H | 1.42894662  | 3.91653670  | -0.49676477 |
|   |             |             |             |

**[IPr·Au]<sup>+</sup>**

|    |             |             |             |
|----|-------------|-------------|-------------|
| Au | -0.00000782 | -0.00006083 | -1.58283940 |
| N  | 1.07680325  | 0.01412385  | 1.17038062  |
| C  | 0.00000045  | -0.00003535 | 0.37464744  |
| C  | 0.67811637  | 0.01035965  | 2.49160929  |
| H  | 1.39125831  | 0.02010948  | 3.29544981  |
| C  | 2.43705225  | 0.03063436  | 0.68899656  |
| C  | 3.08441560  | -1.19542757 | 0.51001395  |
| C  | 4.38118604  | -1.15318851 | 0.00460660  |
| H  | 4.92041424  | -2.07626676 | -0.15626966 |
| C  | 4.98885360  | 0.05682876  | -0.29729176 |
| H  | 5.99696050  | 0.06722693  | -0.68754285 |
| C  | 4.31618309  | 1.25340139  | -0.09985427 |
| H  | 4.80631652  | 2.18751918  | -0.33703301 |
| C  | 3.01663025  | 1.26920138  | 0.40091608  |
| C  | 2.41858464  | -2.52555849 | 0.80865272  |
| H  | 1.47941705  | -2.33642595 | 1.32920177  |
| C  | 2.09305296  | -3.26275492 | -0.49576623 |
| H  | 1.43610499  | -2.66739950 | -1.13273702 |
| H  | 1.59840864  | -4.21048591 | -0.28169456 |

|   |             |             |             |
|---|-------------|-------------|-------------|
| H | 4.02840686  | 3.76317404  | 1.18071273  |
| N | -1.07679633 | -0.01413358 | 1.17038815  |
| C | -0.67810081 | -0.01037325 | 2.49161415  |
| C | -2.43704771 | -0.03059962 | 0.68900983  |
| H | -1.39123747 | -0.02010392 | 3.29545949  |
| C | -3.08436487 | 1.19548525  | 0.51001675  |
| C | -3.01666919 | -1.26914666 | 0.40093218  |
| C | -4.38113636 | 1.15329098  | 0.00460886  |
| C | -2.41848764 | 2.52559330  | 0.80865582  |
| C | -4.31622131 | -1.25330196 | -0.09983862 |
| C | -2.29200448 | -2.58636363 | 0.60237766  |
| H | -4.92033093 | 2.07638796  | -0.15627354 |
| C | -4.98884826 | -0.05670572 | -0.29728232 |
| H | -1.47932825 | 2.33642742  | 1.32920751  |
| C | -2.09292375 | 3.26278010  | -0.49576039 |
| C | -3.28361316 | 3.39764672  | 1.72399066  |
| H | -4.80638807 | -2.18740365 | -0.33701239 |
| H | -1.31110741 | -2.38474462 | 1.03467649  |
| C | -2.07458452 | -3.29710617 | -0.73764694 |

|   |            |             |             |
|---|------------|-------------|-------------|
| H | 3.00571385 | -3.47397968 | -1.05394493 |
| C | 3.28373769 | -3.39758414 | 1.72398824  |
| H | 4.20226915 | -3.70491188 | 1.22470678  |
| H | 2.73928820 | -4.30124734 | 1.99716490  |
| H | 3.55432400 | -2.86733530 | 2.63650595  |
| C | 2.29191867 | 2.58639315  | 0.60236020  |
| H | 1.31103145 | 2.38473952  | 1.03466516  |
| C | 2.07446653 | 3.29712357  | -0.73766655 |
| H | 3.02720072 | 3.54152693  | -1.20769375 |
| H | 1.52425262 | 4.22594184  | -0.58666191 |
| H | 1.50854695 | 2.66969736  | -1.42874767 |
| C | 3.05255765 | 3.48805464  | 1.58052413  |
| H | 3.20831686 | 2.99056073  | 2.53741879  |
| H | 2.49267823 | 4.40666770  | 1.75496865  |

|   |             |             |             |
|---|-------------|-------------|-------------|
| C | -3.05267563 | -3.48799057 | 1.58054851  |
| H | -5.99695573 | -0.06706935 | -0.68753275 |
| H | -1.43599489 | 2.66740098  | -1.13272897 |
| H | -1.59824415 | 4.21049165  | -0.28168440 |
| H | -3.00557294 | 3.47404180  | -1.05394397 |
| H | -4.20213876 | 3.70499636  | 1.22471185  |
| H | -2.73913849 | 4.30129637  | 1.99716173  |
| H | -3.55420981 | 2.86740841  | 2.63651135  |
| H | -3.02732868 | -3.54148155 | -1.20766828 |
| H | -1.52440073 | -4.22594206 | -0.58664076 |
| H | -1.50864798 | -2.66970151 | -1.42873375 |
| H | -3.20840345 | -2.99048988 | 2.53744474  |
| H | -2.49283843 | -4.40663036 | 1.75498760  |
| H | -4.02854181 | -3.76306166 | 1.18074487  |

### AuCl

|    |            |            |             |
|----|------------|------------|-------------|
| Au | 0.00000000 | 0.00000000 | 0.39767000  |
| Cl | 0.00000000 | 0.00000000 | -1.84799400 |

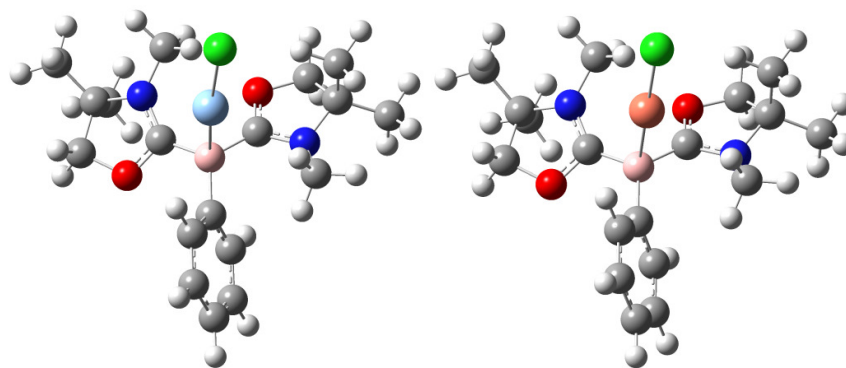

1·AgCl

1·CuCl (7)

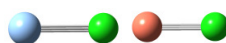

AgCl    CuCl

### 1·AgCl

|    |             |             |             |
|----|-------------|-------------|-------------|
| Ag | -0.50364897 | -0.69818256 | 1.51424569  |
| B  | 0.22890348  | 0.64685747  | -0.25110057 |
| C  | -0.78676094 | -0.06986047 | -1.12158770 |
| C  | -2.77491956 | -0.97276010 | -1.89943876 |
| C  | -1.59015628 | -1.53256717 | -2.67416307 |

|   |             |             |             |
|---|-------------|-------------|-------------|
| H | -1.51374379 | -1.08808642 | -3.66794012 |
| H | -2.76832606 | 0.62106051  | 0.66526105  |
| H | -3.88513015 | 1.04577440  | -0.65752470 |
| H | -2.45370411 | 2.03777111  | -0.35240210 |
| H | -4.77578679 | -0.22020217 | -2.26047641 |

|    |             |             |             |
|----|-------------|-------------|-------------|
| C  | -2.84251710 | 1.02544719  | -0.35047291 |
| C  | -3.91182634 | -0.56878440 | -2.82488778 |
| C  | -3.23917062 | -1.94306461 | -0.81327046 |
| C  | 1.70937052  | 0.20507954  | -0.34444035 |
| C  | 3.78391469  | -0.78639876 | -0.69641082 |
| C  | 3.92821880  | 0.59786891  | -0.07664273 |
| C  | 1.72139341  | -2.28372553 | -0.54570037 |
| C  | 4.07860908  | -0.77169190 | -2.19509514 |
| C  | 4.62623918  | -1.82072723 | 0.03356672  |
| C  | 0.01816065  | 2.19463685  | 0.09166139  |
| C  | 0.01132459  | 2.70794434  | 1.39227811  |
| C  | -0.16259649 | 4.06475327  | 1.64255798  |
| C  | -0.33375030 | 4.95180865  | 0.58734605  |
| C  | -0.31829538 | 4.47122143  | -0.71669774 |
| C  | -0.13889675 | 3.11353512  | -0.95377787 |
| Cl | -1.39435299 | -2.28142617 | 3.06692512  |
| N  | -2.10329231 | 0.19976208  | -1.29265510 |
| N  | 2.33052633  | -0.96997304 | -0.48160165 |
| O  | -0.44487745 | -1.12095448 | -1.90926874 |
| O  | 2.62535701  | 1.18102300  | -0.23410462 |
| H  | -1.59118810 | -2.61755241 | -2.73913418 |

|   |             |             |             |
|---|-------------|-------------|-------------|
| H | -4.23079435 | -1.43211577 | -3.41052680 |
| H | -3.58708938 | 0.22040088  | -3.50219561 |
| H | -2.40602048 | -2.25673443 | -0.18077319 |
| H | -3.68527055 | -2.82702707 | -1.27044792 |
| H | -3.98742397 | -1.47887515 | -0.17137364 |
| H | 4.15041084  | 0.54050749  | 0.99024119  |
| H | 4.64809478  | 1.23259284  | -0.58465056 |
| H | 0.75083527  | -2.25322644 | -0.05739300 |
| H | 2.35540767  | -2.98751990 | -0.01150719 |
| H | 1.58074833  | -2.60817717 | -1.57473180 |
| H | 3.78739007  | -1.71863876 | -2.64938310 |
| H | 5.14512042  | -0.62107813 | -2.36676347 |
| H | 3.52508440  | 0.03359201  | -2.67894237 |
| H | 4.30342967  | -1.92049528 | 1.06978240  |
| H | 5.66861728  | -1.50020565 | 0.02294806  |
| H | 4.57504297  | -2.79374317 | -0.45329757 |
| H | 0.13786380  | 2.03068349  | 2.22888956  |
| H | -0.16952335 | 4.42783642  | 2.66179742  |
| H | -0.47544426 | 6.00687659  | 0.77908346  |
| H | -0.44303211 | 5.15420415  | -1.54690992 |
| H | -0.12910474 | 2.75155386  | -1.97556405 |

**1-CuCl (7)**

|    |             |             |             |
|----|-------------|-------------|-------------|
| Cu | -0.41220839 | -0.45223516 | 1.54116173  |
| B  | 0.13404506  | 0.57177410  | -0.28394740 |
| C  | -0.87123522 | -0.36678205 | -0.90300153 |
| C  | -2.82848663 | -1.54247078 | -1.31860056 |
| C  | -1.65989885 | -2.15571988 | -2.07798904 |
| C  | -2.94908317 | 0.69130866  | -0.14592792 |
| C  | -4.06190807 | -1.40575046 | -2.19746541 |
| C  | -3.12474207 | -2.31850509 | -0.03530284 |
| C  | 1.63149341  | 0.20473114  | -0.34792888 |
| C  | 3.75065800  | -0.72905282 | -0.56147656 |
| C  | 3.82940924  | 0.75915824  | -0.24388520 |
| C  | 1.77989566  | -2.26834175 | -0.04264097 |
| C  | 4.01288357  | -1.01134107 | -2.03962834 |
| C  | 4.66799989  | -1.54250118 | 0.33853788  |
| C  | -0.18218123 | 2.12754591  | -0.11899056 |
| C  | -0.15301268 | 2.78425088  | 1.11545565  |
| C  | -0.42573121 | 4.14320798  | 1.22626467  |
| C  | -0.73315955 | 4.88619840  | 0.09334304  |
| C  | -0.75692288 | 4.26120377  | -1.14785987 |
| C  | -0.47943154 | 2.90278530  | -1.24630396 |

|   |             |             |             |
|---|-------------|-------------|-------------|
| H | -1.69792791 | -1.90881716 | -3.14050868 |
| H | -2.76655863 | 0.46929837  | 0.91222247  |
| H | -4.01083045 | 0.59202168  | -0.35703651 |
| H | -2.64320126 | 1.71229421  | -0.34626086 |
| H | -4.90243530 | -0.99928774 | -1.63616676 |
| H | -4.36011880 | -2.38760669 | -2.56755683 |
| H | -3.85232347 | -0.75363330 | -3.04473538 |
| H | -2.22610036 | -2.43032273 | 0.57465859  |
| H | -3.51174356 | -3.30849733 | -0.28015192 |
| H | -3.87107739 | -1.80268788 | 0.56831771  |
| H | 4.08332843  | 0.93473778  | 0.80274512  |
| H | 4.49733404  | 1.31156651  | -0.89809792 |
| H | 0.84554565  | -2.19399321 | 0.50904453  |
| H | 2.48785329  | -2.83116029 | 0.56039937  |
| H | 1.58861913  | -2.78247307 | -0.98194205 |
| H | 3.77270382  | -2.04785568 | -2.27712631 |
| H | 5.06437245  | -0.83986045 | -2.27378915 |
| H | 3.40041897  | -0.35853899 | -2.66229528 |
| H | 4.36554487  | -1.45020860 | 1.38152045  |
| H | 5.68706509  | -1.16771899 | 0.23695426  |



|    |             |             |             |
|----|-------------|-------------|-------------|
| Cl | -0.95704549 | -1.62876688 | 3.29588716  |
| N  | -2.22138201 | -0.22875815 | -1.00682032 |
| N  | 2.31608811  | -0.93936299 | -0.26413791 |
| O  | -0.50019522 | -1.52593095 | -1.51043262 |
| O  | 2.49100440  | 1.22999566  | -0.46657445 |
| H  | -1.57314369 | -3.23022997 | -1.93788509 |

|   |             |             |             |
|---|-------------|-------------|-------------|
| H | 4.67419527  | -2.59521164 | 0.05844146  |
| H | 0.07943355  | 2.21823887  | 2.01083100  |
| H | -0.40270233 | 4.61988712  | 2.19721314  |
| H | -0.95067066 | 5.94250858  | 0.17670887  |
| H | -0.98919205 | 4.83217620  | -2.03753874 |
| H | -0.50349369 | 2.42513955  | -2.21883370 |

### AgCl

|    |             |             |             |
|----|-------------|-------------|-------------|
| Ag | 0.00000000  | -0.00000000 | 0.62434310  |
| Cl | -0.00000000 | 0.00000000  | -1.72612504 |

### CuCl

|    |            |             |             |
|----|------------|-------------|-------------|
| Cu | 0.00000000 | 0.00000000  | 0.78896228  |
| Cl | 0.00000000 | -0.00000000 | -1.34587684 |

## Supplementary Table 1 Raw Energy Data.

| Compounds                   | E [au]         | ZPE corr <sup>a</sup> [au] | H corr <sup>b</sup> [au] | G corr <sup>c</sup> [au] |
|-----------------------------|----------------|----------------------------|--------------------------|--------------------------|
| <b>1</b>                    | -987.08561029  | 0.436311                   | 0.460375                 | 0.384212                 |
| <b>8</b>                    | -1137.46531924 | 0.439152                   | 0.467303                 | 0.37969                  |
| <b>6</b>                    | -2282.62554858 | 1.01839                    | 1.075617                 | 0.926304                 |
| <b>IPr</b>                  | -1160.19028039 | 0.576939                   | 0.607816                 | 0.514739                 |
| <b>[1·Au]<sup>+</sup></b>   | -1122.32050237 | 0.438776                   | 0.4653                   | 0.380607                 |
| <b>[IPr·Au]<sup>+</sup></b> | -1295.39238294 | 0.579118                   | 0.612167                 | 0.512966                 |
| <b>AuCl</b>                 | -150.254844441 | 0.000815                   | 0.004473                 | -0.024170                |

<sup>a</sup> Zero Point Energy Correction. <sup>b</sup> Enthalpy Correction. <sup>c</sup> Free Energy Correction.

## Supplementary Table 2 Calculated bond dissociation energies $D_e$ [kcal·mol<sup>-1</sup>].

|                   | $D_e$         | $D_e$ with ZPE corr <sup>a</sup> | $D_e$ with H corr <sup>b</sup> | $D_e$ with G corr <sup>c</sup> |
|-------------------|---------------|----------------------------------|--------------------------------|--------------------------------|
| B:→Au in <b>8</b> | 78.3536617397 | 77.0823275555                    | 76.8131259932                  | 66.0243556928                  |
| B:→Au in <b>6</b> | 92.5923793269 | 90.7343237891                    | 90.6627877096                  | 74.3155385325                  |
| C:→Au in <b>6</b> | 72.0166387677 | 70.3380509380                    | 70.4472375858                  | 52.5902006262                  |

<sup>a</sup> Zero Point Energy Correction. <sup>b</sup> Enthalpy Correction. <sup>c</sup> Free Energy Correction.

## Supplementary Table 3 Raw Energy Data.

| Compounds     | E [au]         | ZPE corr <sup>a</sup> [au] | H corr <sup>b</sup> [au] | G corr <sup>c</sup> [au] |
|---------------|----------------|----------------------------|--------------------------|--------------------------|
| <b>1</b>      | -987.08561029  | 0.436311                   | 0.460375                 | 0.384212                 |
| <b>1·AgCl</b> | -1147.78136245 | 0.438603                   | 0.466942                 | 0.378608                 |
| <b>1·CuCl</b> | -1198.26913683 | 0.438408                   | 0.466833                 | 0.377844                 |
| <b>AgCl</b>   | -160.606807730 | 0.000713                   | 0.004422                 | -0.023600                |
| <b>CuCl</b>   | -211.081114545 | 0.000857                   | 0.004495                 | -0.022532                |

<sup>a</sup> Zero Point Energy Correction. <sup>b</sup> Enthalpy Correction. <sup>c</sup> Free Energy Correction.

**Supplementary Table 4** Calculated bond dissociation energies  $D_e$  [kcal·mol<sup>-1</sup>].

|                        | $D_e$         | $D_e$ with ZPE corr <sup>a</sup> | $D_e$ with H corr <sup>b</sup> | $D_e$ with G corr <sup>c</sup> |
|------------------------|---------------|----------------------------------|--------------------------------|--------------------------------|
| B:→Ag in <b>1·AgCl</b> | 55.8134720399 | 54.8226345882                    | 54.4674642288                  | 44.5208116357                  |
| B:→Cu in <b>1·CuCl</b> | 64.2644966017 | 63.4863848601                    | 63.0326955141                  | 54.1214335447                  |

<sup>a</sup> Zero Point Energy Correction. <sup>b</sup> Enthalpy Correction. <sup>c</sup> Free Energy Correction.

**Supplementary Table 5** The NPA charges of **6**.

| ----- |    |          |          |                    |         |          |
|-------|----|----------|----------|--------------------|---------|----------|
| Atom  | No | Charge   | Core     | Natural<br>Valence | Rydberg | Total    |
| ----- |    |          |          |                    |         |          |
| Au    | 1  | 0.12209  | 67.98685 | 10.87825           | 0.01281 | 78.87791 |
| B     | 2  | -0.22760 | 1.99851  | 3.19871            | 0.03037 | 5.22760  |
| C     | 3  | 0.13597  | 1.99924  | 3.82018            | 0.04462 | 5.86403  |
| C     | 4  | -0.05706 | 1.99924  | 4.03878            | 0.01904 | 6.05706  |
| C     | 5  | -0.05421 | 1.99924  | 4.03589            | 0.01908 | 6.05421  |
| C     | 6  | 0.12051  | 1.99882  | 3.85942            | 0.02125 | 5.87949  |
| C     | 7  | 0.00024  | 1.99903  | 3.98115            | 0.01958 | 5.99976  |
| C     | 8  | -0.22599 | 1.99937  | 4.21202            | 0.01460 | 6.22599  |
| C     | 9  | -0.58828 | 1.99951  | 4.57943            | 0.00934 | 6.58828  |
| C     | 10 | -0.59743 | 1.99952  | 4.58850            | 0.00941 | 6.59743  |
| C     | 11 | -0.22286 | 1.99920  | 4.20869            | 0.01497 | 6.22286  |
| C     | 12 | -0.16933 | 1.99931  | 4.15399            | 0.01603 | 6.16933  |
| C     | 13 | -0.21816 | 1.99920  | 4.20387            | 0.01510 | 6.21816  |
| C     | 14 | 0.00345  | 1.99903  | 3.97843            | 0.01908 | 5.99655  |
| C     | 15 | -0.23027 | 1.99937  | 4.21680            | 0.01410 | 6.23027  |
| C     | 16 | -0.59238 | 1.99951  | 4.58334            | 0.00953 | 6.59238  |
| C     | 17 | -0.59145 | 1.99952  | 4.58219            | 0.00975 | 6.59145  |
| C     | 18 | 0.12532  | 1.99883  | 3.85463            | 0.02123 | 5.87468  |
| C     | 19 | 0.00211  | 1.99905  | 3.97991            | 0.01894 | 5.99789  |
| C     | 20 | -0.22884 | 1.99938  | 4.21533            | 0.01414 | 6.22884  |
| C     | 21 | -0.59350 | 1.99951  | 4.58477            | 0.00921 | 6.59350  |
| C     | 22 | -0.59599 | 1.99952  | 4.58679            | 0.00969 | 6.59599  |
| C     | 23 | -0.22511 | 1.99920  | 4.21084            | 0.01507 | 6.22511  |
| C     | 24 | -0.18424 | 1.99931  | 4.16875            | 0.01618 | 6.18424  |
| C     | 25 | -0.22893 | 1.99920  | 4.21471            | 0.01502 | 6.22893  |
| C     | 26 | 0.00647  | 1.99903  | 3.97486            | 0.01964 | 5.99353  |
| C     | 27 | -0.22770 | 1.99937  | 4.21394            | 0.01440 | 6.22770  |
| C     | 28 | -0.58872 | 1.99951  | 4.57982            | 0.00939 | 6.58872  |
| C     | 29 | -0.59433 | 1.99952  | 4.58493            | 0.00988 | 6.59433  |
| C     | 30 | -0.23838 | 1.99908  | 4.21329            | 0.02601 | 6.23838  |
| C     | 31 | -0.20885 | 1.99922  | 4.19373            | 0.01589 | 6.20885  |
| C     | 32 | -0.21322 | 1.99930  | 4.19856            | 0.01536 | 6.21322  |

|   |    |          |         |         |         |         |
|---|----|----------|---------|---------|---------|---------|
| C | 33 | -0.21423 | 1.99931 | 4.19926 | 0.01566 | 6.21423 |
| C | 34 | -0.21207 | 1.99930 | 4.19674 | 0.01602 | 6.21207 |
| C | 35 | -0.21354 | 1.99922 | 4.19816 | 0.01615 | 6.21354 |
| C | 36 | 0.53416  | 1.99886 | 3.42562 | 0.04136 | 5.46584 |
| C | 37 | -0.04588 | 1.99921 | 4.02550 | 0.02117 | 6.04588 |
| C | 38 | 0.14826  | 1.99941 | 3.83380 | 0.01853 | 5.85174 |
| C | 39 | -0.62101 | 1.99945 | 4.61011 | 0.01145 | 6.62101 |
| C | 40 | -0.62171 | 1.99944 | 4.61037 | 0.01189 | 6.62171 |
| C | 41 | -0.39053 | 1.99948 | 4.37679 | 0.01425 | 6.39053 |
| C | 42 | 0.55596  | 1.99895 | 3.40255 | 0.04255 | 5.44404 |
| C | 43 | -0.04624 | 1.99920 | 4.02632 | 0.02072 | 6.04624 |
| C | 44 | 0.14717  | 1.99941 | 3.83532 | 0.01810 | 5.85283 |
| C | 45 | -0.61920 | 1.99945 | 4.60820 | 0.01154 | 6.61920 |
| C | 46 | -0.62545 | 1.99944 | 4.61430 | 0.01171 | 6.62545 |
| C | 47 | -0.38651 | 1.99947 | 4.37225 | 0.01479 | 6.38651 |
| N | 48 | -0.39964 | 1.99925 | 5.38566 | 0.01473 | 7.39964 |
| N | 49 | -0.40266 | 1.99926 | 5.38884 | 0.01456 | 7.40266 |
| N | 50 | -0.44584 | 1.99917 | 5.43134 | 0.01533 | 7.44584 |
| N | 51 | -0.43839 | 1.99918 | 5.42429 | 0.01491 | 7.43839 |
| O | 52 | -0.52829 | 1.99973 | 6.51832 | 0.01025 | 8.52829 |
| O | 53 | -0.49304 | 1.99973 | 6.48305 | 0.01026 | 8.49304 |
| H | 54 | 0.24867  | 0.00000 | 0.75007 | 0.00126 | 0.75133 |
| H | 55 | 0.24962  | 0.00000 | 0.74910 | 0.00128 | 0.75038 |
| H | 56 | 0.21684  | 0.00000 | 0.78055 | 0.00260 | 0.78316 |
| H | 57 | 0.21270  | 0.00000 | 0.78602 | 0.00127 | 0.78730 |
| H | 58 | 0.21142  | 0.00000 | 0.78721 | 0.00137 | 0.78858 |
| H | 59 | 0.20522  | 0.00000 | 0.79338 | 0.00140 | 0.79478 |
| H | 60 | 0.20215  | 0.00000 | 0.79613 | 0.00172 | 0.79785 |
| H | 61 | 0.21054  | 0.00000 | 0.78767 | 0.00178 | 0.78946 |
| H | 62 | 0.21822  | 0.00000 | 0.77969 | 0.00209 | 0.78178 |
| H | 63 | 0.22194  | 0.00000 | 0.77572 | 0.00234 | 0.77806 |
| H | 64 | 0.22494  | 0.00000 | 0.77372 | 0.00134 | 0.77506 |
| H | 65 | 0.22607  | 0.00000 | 0.77167 | 0.00226 | 0.77393 |
| H | 66 | 0.21420  | 0.00000 | 0.78336 | 0.00245 | 0.78580 |
| H | 67 | 0.21456  | 0.00000 | 0.78410 | 0.00134 | 0.78544 |
| H | 68 | 0.21341  | 0.00000 | 0.78532 | 0.00127 | 0.78659 |
| H | 69 | 0.20370  | 0.00000 | 0.79490 | 0.00140 | 0.79630 |
| H | 70 | 0.21861  | 0.00000 | 0.77957 | 0.00182 | 0.78139 |
| H | 71 | 0.21039  | 0.00000 | 0.78792 | 0.00170 | 0.78961 |
| H | 72 | 0.21095  | 0.00000 | 0.78724 | 0.00181 | 0.78905 |
| H | 73 | 0.21945  | 0.00000 | 0.77817 | 0.00239 | 0.78055 |
| H | 74 | 0.20309  | 0.00000 | 0.79514 | 0.00177 | 0.79691 |
| H | 75 | 0.21955  | 0.00000 | 0.77918 | 0.00126 | 0.78045 |
| H | 76 | 0.21143  | 0.00000 | 0.78686 | 0.00171 | 0.78857 |

|       |         |         |         |         |         |
|-------|---------|---------|---------|---------|---------|
| H 77  | 0.21622 | 0.00000 | 0.78248 | 0.00131 | 0.78378 |
| H 78  | 0.21620 | 0.00000 | 0.78254 | 0.00125 | 0.78380 |
| H 79  | 0.20205 | 0.00000 | 0.79654 | 0.00140 | 0.79795 |
| H 80  | 0.22676 | 0.00000 | 0.77108 | 0.00216 | 0.77324 |
| H 81  | 0.22486 | 0.00000 | 0.77382 | 0.00132 | 0.77514 |
| H 82  | 0.22394 | 0.00000 | 0.77371 | 0.00235 | 0.77606 |
| H 83  | 0.22083 | 0.00000 | 0.77628 | 0.00289 | 0.77917 |
| H 84  | 0.21151 | 0.00000 | 0.78718 | 0.00130 | 0.78849 |
| H 85  | 0.21420 | 0.00000 | 0.78445 | 0.00135 | 0.78580 |
| H 86  | 0.20427 | 0.00000 | 0.79432 | 0.00141 | 0.79573 |
| H 87  | 0.19722 | 0.00000 | 0.80100 | 0.00179 | 0.80278 |
| H 88  | 0.21913 | 0.00000 | 0.77926 | 0.00160 | 0.78087 |
| H 89  | 0.21782 | 0.00000 | 0.77984 | 0.00233 | 0.78218 |
| H 90  | 0.21944 | 0.00000 | 0.77788 | 0.00268 | 0.78056 |
| H 91  | 0.21156 | 0.00000 | 0.78660 | 0.00184 | 0.78844 |
| H 92  | 0.21670 | 0.00000 | 0.78205 | 0.00125 | 0.78330 |
| H 93  | 0.21520 | 0.00000 | 0.78346 | 0.00134 | 0.78480 |
| H 94  | 0.20157 | 0.00000 | 0.79589 | 0.00254 | 0.79843 |
| H 95  | 0.19583 | 0.00000 | 0.80223 | 0.00194 | 0.80417 |
| H 96  | 0.21256 | 0.00000 | 0.78594 | 0.00150 | 0.78744 |
| H 97  | 0.22407 | 0.00000 | 0.77469 | 0.00124 | 0.77593 |
| H 98  | 0.22249 | 0.00000 | 0.77609 | 0.00143 | 0.77751 |
| H 99  | 0.22080 | 0.00000 | 0.77785 | 0.00135 | 0.77920 |
| H 100 | 0.22410 | 0.00000 | 0.77432 | 0.00157 | 0.77590 |
| H 101 | 0.22853 | 0.00000 | 0.77021 | 0.00126 | 0.77147 |
| H 102 | 0.22280 | 0.00000 | 0.77571 | 0.00148 | 0.77720 |
| H 103 | 0.24497 | 0.00000 | 0.75295 | 0.00208 | 0.75503 |
| H 104 | 0.20844 | 0.00000 | 0.78994 | 0.00162 | 0.79156 |
| H 105 | 0.22967 | 0.00000 | 0.76851 | 0.00182 | 0.77033 |
| H 106 | 0.19995 | 0.00000 | 0.79830 | 0.00175 | 0.80005 |
| H 107 | 0.21454 | 0.00000 | 0.78400 | 0.00146 | 0.78546 |
| H 108 | 0.21814 | 0.00000 | 0.78043 | 0.00143 | 0.78186 |
| H 109 | 0.22311 | 0.00000 | 0.77545 | 0.00144 | 0.77689 |
| H 110 | 0.22123 | 0.00000 | 0.77744 | 0.00133 | 0.77877 |
| H 111 | 0.22464 | 0.00000 | 0.77368 | 0.00168 | 0.77536 |
| H 112 | 0.22980 | 0.00000 | 0.76892 | 0.00127 | 0.77020 |
| H 113 | 0.22236 | 0.00000 | 0.77629 | 0.00135 | 0.77764 |
| H 114 | 0.24069 | 0.00000 | 0.75720 | 0.00211 | 0.75931 |
| H 115 | 0.22024 | 0.00000 | 0.77784 | 0.00192 | 0.77976 |
| H 116 | 0.20922 | 0.00000 | 0.78907 | 0.00171 | 0.79078 |

---



---

|           |         |           |           |         |          |
|-----------|---------|-----------|-----------|---------|----------|
| * Total * | 1.00000 | 171.94943 | 287.04942 | 1.00116 | 460.0000 |
|-----------|---------|-----------|-----------|---------|----------|

**Supplementary Table 6** The NPA charges of **8**.

| Atom | No | Charge   | Core     | Natural<br>Valence | Rydberg | Total    |
|------|----|----------|----------|--------------------|---------|----------|
| Au   | 1  | 0.17304  | 67.98763 | 10.82751           | 0.01182 | 78.82696 |
| B    | 2  | -0.14606 | 1.99830  | 3.11071            | 0.03705 | 5.14606  |
| C    | 3  | 0.49510  | 1.99890  | 3.46383            | 0.04216 | 5.50490  |
| C    | 4  | 0.14680  | 1.99942  | 3.83449            | 0.01930 | 5.85320  |
| C    | 5  | -0.04434 | 1.99919  | 4.02356            | 0.02158 | 6.04434  |
| C    | 6  | -0.39198 | 1.99947  | 4.37870            | 0.01381 | 6.39198  |
| C    | 7  | -0.61726 | 1.99944  | 4.60559            | 0.01223 | 6.61726  |
| C    | 8  | -0.63033 | 1.99945  | 4.61951            | 0.01137 | 6.63033  |
| C    | 9  | 0.56013  | 1.99902  | 3.39801            | 0.04284 | 5.43987  |
| C    | 10 | 0.14606  | 1.99942  | 3.83662            | 0.01789 | 5.85394  |
| C    | 11 | -0.04761 | 1.99920  | 4.02749            | 0.02091 | 6.04761  |
| C    | 12 | -0.37989 | 1.99945  | 4.36577            | 0.01467 | 6.37989  |
| C    | 13 | -0.61975 | 1.99945  | 4.60884            | 0.01145 | 6.61975  |
| C    | 14 | -0.62427 | 1.99944  | 4.61293            | 0.01190 | 6.62427  |
| C    | 15 | -0.24234 | 1.99913  | 4.21660            | 0.02661 | 6.24234  |
| C    | 16 | -0.19599 | 1.99923  | 4.18081            | 0.01595 | 6.19599  |
| C    | 17 | -0.21168 | 1.99931  | 4.19670            | 0.01568 | 6.21168  |
| C    | 18 | -0.22310 | 1.99932  | 4.20824            | 0.01554 | 6.22310  |
| C    | 19 | -0.21855 | 1.99931  | 4.20330            | 0.01594 | 6.21855  |
| C    | 20 | -0.21793 | 1.99923  | 4.20238            | 0.01632 | 6.21793  |
| Cl   | 21 | -0.60731 | 10.00000 | 7.60000            | 0.00731 | 17.60731 |
| N    | 22 | -0.47130 | 1.99921  | 5.45629            | 0.01581 | 7.47130  |
| N    | 23 | -0.43813 | 1.99921  | 5.42399            | 0.01493 | 7.43813  |
| O    | 24 | -0.54051 | 1.99972  | 6.53009            | 0.01070 | 8.54051  |
| O    | 25 | -0.49661 | 1.99973  | 6.48656            | 0.01032 | 8.49661  |
| H    | 26 | 0.20348  | 0.00000  | 0.79493            | 0.00159 | 0.79652  |
| H    | 27 | 0.18952  | 0.00000  | 0.80847            | 0.00200 | 0.81048  |
| H    | 28 | 0.22586  | 0.00000  | 0.77263            | 0.00151 | 0.77414  |
| H    | 29 | 0.20216  | 0.00000  | 0.79641            | 0.00143 | 0.79784  |
| H    | 30 | 0.24184  | 0.00000  | 0.75670            | 0.00146 | 0.75816  |
| H    | 31 | 0.21844  | 0.00000  | 0.77999            | 0.00156 | 0.78156  |
| H    | 32 | 0.21891  | 0.00000  | 0.77969            | 0.00140 | 0.78109  |
| H    | 33 | 0.21946  | 0.00000  | 0.77847            | 0.00206 | 0.78054  |
| H    | 34 | 0.24069  | 0.00000  | 0.75820            | 0.00110 | 0.75931  |
| H    | 35 | 0.21454  | 0.00000  | 0.78393            | 0.00153 | 0.78546  |
| H    | 36 | 0.22314  | 0.00000  | 0.77557            | 0.00129 | 0.77686  |
| H    | 37 | 0.19831  | 0.00000  | 0.79980            | 0.00189 | 0.80169  |
| H    | 38 | 0.20788  | 0.00000  | 0.79063            | 0.00149 | 0.79212  |
| H    | 39 | 0.25079  | 0.00000  | 0.74784            | 0.00137 | 0.74921  |

|   |    |         |         |         |         |         |
|---|----|---------|---------|---------|---------|---------|
| H | 40 | 0.20557 | 0.00000 | 0.79313 | 0.00130 | 0.79443 |
| H | 41 | 0.20476 | 0.00000 | 0.79371 | 0.00154 | 0.79524 |
| H | 42 | 0.21704 | 0.00000 | 0.78148 | 0.00148 | 0.78296 |
| H | 43 | 0.21677 | 0.00000 | 0.78171 | 0.00152 | 0.78323 |
| H | 44 | 0.22084 | 0.00000 | 0.77780 | 0.00136 | 0.77916 |
| H | 45 | 0.22802 | 0.00000 | 0.77036 | 0.00162 | 0.77198 |
| H | 46 | 0.22380 | 0.00000 | 0.77486 | 0.00134 | 0.77620 |
| H | 47 | 0.21976 | 0.00000 | 0.77879 | 0.00146 | 0.78024 |
| H | 48 | 0.22264 | 0.00000 | 0.77560 | 0.00176 | 0.77736 |
| H | 49 | 0.21137 | 0.00000 | 0.78730 | 0.00132 | 0.78863 |
| H | 50 | 0.20961 | 0.00000 | 0.78913 | 0.00126 | 0.79039 |
| H | 51 | 0.20787 | 0.00000 | 0.79073 | 0.00140 | 0.79213 |
| H | 52 | 0.20074 | 0.00000 | 0.79679 | 0.00247 | 0.79926 |

---



---

|           |         |           |           |         |           |
|-----------|---------|-----------|-----------|---------|-----------|
| * Total * | 0.00000 | 123.97120 | 141.53321 | 0.49559 | 266.00000 |
|-----------|---------|-----------|-----------|---------|-----------|

**Supplementary Table 7** X-ray data for compounds **2**, **3**, **4**, **6** and **8**.

| Compounds                                    | <b>2</b>                                                                          | <b>3</b>                                                            | <b>4·(Tol)</b>                                                     |
|----------------------------------------------|-----------------------------------------------------------------------------------|---------------------------------------------------------------------|--------------------------------------------------------------------|
| Formula                                      | C <sub>19</sub> H <sub>27</sub> BF <sub>3</sub> LiN <sub>2</sub> O <sub>5</sub> S | C <sub>26</sub> H <sub>39</sub> BClN <sub>2</sub> O <sub>2</sub> Rh | C <sub>33</sub> H <sub>47</sub> BClIrN <sub>2</sub> O <sub>2</sub> |
| Fw                                           | 470.23                                                                            | 560.76                                                              | 742.18                                                             |
| Crystalsyst                                  | triclinic                                                                         | monoclinic                                                          | monoclinic                                                         |
| Space group                                  | P -1                                                                              | P2 <sub>1</sub> /c                                                  | P 1 2/c 1                                                          |
| Size (mm <sup>3</sup> )                      | 0.040 x 0.080 x 0.120                                                             | 0.16 × 0.12 × 0.02                                                  | 0.120 x 0.160 x 0.200                                              |
| T/K                                          | 103(2)                                                                            | 103(2)                                                              | 103(2)                                                             |
| <i>a</i> , Å                                 | 5.9513(6)                                                                         | 16.460(2)                                                           | 35.4699(14)                                                        |
| <i>b</i> , Å                                 | 10.9562(11)                                                                       | 13.8072(16)                                                         | 10.6670(5)                                                         |
| <i>c</i> , Å                                 | 17.3953(15)                                                                       | 11.9483(18)                                                         | 18.1337(8)                                                         |
| $\alpha$ , deg                               | 96.176(5)                                                                         | 90                                                                  | 90                                                                 |
| $\beta$ , deg                                | 93.242(5)                                                                         | 104.628(9)                                                          | 115.404(2)                                                         |
| $\gamma$ , deg                               | 97.646(6)                                                                         | 90                                                                  | 90                                                                 |
| V, Å <sup>3</sup>                            | 1114.73(19)                                                                       | 2627.4(6)                                                           | 6197.6(5)                                                          |
| Z                                            | 2                                                                                 | 4                                                                   | 8                                                                  |
| <i>d</i> <sub>calcd</sub> g·cm <sup>-3</sup> | 1.401                                                                             | 1.418                                                               | 1.591                                                              |
| $\mu$ , mm <sup>-1</sup>                     | 0.203                                                                             | 0.777                                                               | 4.427                                                              |
| Refl collected                               | 15655                                                                             | 5132                                                                | 74988                                                              |

|                                                   |               |             |               |
|---------------------------------------------------|---------------|-------------|---------------|
| $T_{\max}/T_{\min}$                               | 0.9920/0.9760 | 0.985/0.886 | 0.6190/0.4710 |
| $N_{\text{measd}}$                                | 4579          | 4810        | 9999          |
| [R int]                                           | 0.1403        | 0.1241      | 0.0876        |
| R [I>2sigma(I)]                                   | 0.0685        | 0.0886      | 0.0285        |
| $R_w$ [I>2sigma(I)]                               | 0.1408        | 0.1934      | 0.0583        |
| GOF                                               | 0.996         | 1.005       | 1.017         |
| Largest diff.<br>peak/ hole [e. Å <sup>-3</sup> ] | 0.347/-0.459  | 3.30/-0.91  | 1.136/-0.736  |

---

| Compounds                            | <b>6</b> ·(THF) <sub>2</sub>                                       | <b>8</b>                                                           |
|--------------------------------------|--------------------------------------------------------------------|--------------------------------------------------------------------|
| Formula                              | C <sub>53</sub> H <sub>79</sub> AuBClN <sub>4</sub> O <sub>4</sub> | C <sub>18</sub> H <sub>27</sub> AuBClN <sub>2</sub> O <sub>2</sub> |
| Fw                                   | 1079.42                                                            | 546.64                                                             |
| Crystalsyst                          | monoclinic                                                         | monoclinic                                                         |
| Space group                          | P 1 21/c 1                                                         | P 1 21/n 1                                                         |
| Size (mm <sup>3</sup> )              | 0.020 x 0.120 x 0.360                                              | 0.100 x 0.160 x 0.180                                              |
| T/K                                  | 103(2)                                                             | 103(2)                                                             |
| <i>a</i> , Å                         | 15.396(2)                                                          | 11.2950(11)                                                        |
| <i>b</i> , Å                         | 14.4925(19)                                                        | 10.5120(8)                                                         |
| <i>c</i> , Å                         | 24.966(4)                                                          | 16.9583(16)                                                        |
| $\alpha$ , deg                       | 90                                                                 | 90                                                                 |
| $\beta$ , deg                        | 100.935(6)                                                         | 102.328(4)                                                         |
| $\gamma$ , deg                       | 90                                                                 | 90                                                                 |
| <i>V</i> , Å <sup>3</sup>            | 5469.4(13)                                                         | 1967.1(3)                                                          |
| <i>Z</i>                             | 4                                                                  | 4                                                                  |
| $d_{\text{calcd}}$ ·cm <sup>-3</sup> | 1.311                                                              | 1.846                                                              |
| $\mu$ , mm <sup>-1</sup>             | 2.783                                                              | 7.628                                                              |
| Refl collected                       | 107465                                                             | 3863                                                               |
| $T_{\max}/T_{\min}$                  | 0.9460/0.4340                                                      | 0.5160/0.3410                                                      |

|                                                  |              |              |
|--------------------------------------------------|--------------|--------------|
| $N_{\text{measd}}$                               | 9566         | 3863         |
| [R int]                                          | 0.1218       | 0.0680       |
| R [ $I > 2\sigma(I)$ ]                           | 0.0756       | 0.0378       |
| $R_w$ [ $I > 2\sigma(I)$ ]                       | 0.1768       | 0.1297       |
| GOF                                              | 1.126        | 1.151        |
| Largest diff.<br>peak/ hole[e. Å <sup>-3</sup> ] | 3.610/-2.353 | 2.094/-3.545 |

---

### Supplementary References

1. M. N. Cheemala and P. Knochel, New P, *Org. Lett.*, 2007, **9**, 3089.
2. J. S. M. Samec and Jan-E. Bäckvall, *Chem.–Eur. J.*, 2002, **8**, 2955.
3. A. Lühl, L. Hartenstein, S. Blechert and P. W. Roesky, *Organometallics*, 2012, **31**, 7109.
4. E. Kumaran and W. K. Leong, *Organometallics*, 2012, **31**, 1068.
5. N. Senthilkumar, P. Gandeepan, J. Jayakumar and C.-H. Cheng, *Chem. Commun.*, 2014, **50**, 3106.
6. V. Lavallo, J. H. Wright II, F. S. Tham and S. Quinlivan, *Angew. Chem., Int. Ed.*, 2013, **52**, 3172.
7. P. Zhao, C. Krug and J. F. Hartwig, *J. Am. Chem. Soc.*, 2005, **127**, 12066.
8. J. M. Carney, P. J. Donoghue, W. M. Wuest, O. Wiest and P. Helquist, *Org. Lett.*, 2008, **10**, 3903.
9. A. V. Butin, M. G. Uchuskin, A. S. Pilipenko, O. V. Serdyuk and I. V. Trushkov, *Tetrahedron Lett.*, 2011, **52**, 5255.
10. T. Kinoshita and Koji. Ichinose, *Heterocycles*, 2005, **65**, 1641.
11. M. Kumar, M. Scobie, M. S. Mashuta, G. B. Hammond and B. Xu, *Org. Lett.*, 2013, **15**, 724.
12. C. Efe, I. N.vLykakis and M. Stratakis, *Chem. Commu.*, 2011, **47**, 803.
13. J. J. Kennedy-Smith, S. T. Staben, and F. D. Toste, *J. Am. Chem. Soc.*, 2004, **126**, 4526.
14. Bruker AXS SHELXTL, Madison, WI; *SHELX-97G*. M. Sheldrick, *ActaCrystallogr. A*, 2008, **64**, 112; *SHELX-2013*, <http://shelx.uni-ac.gwdg.de/SHELX/index.php>.
15. Gaussian 09, Revision B.01, M. J. Frisch, G. W. Trucks, H. B. Schlegel, G. E. Scuseria, M. A. Robb, J. R. Cheeseman, G. Scalmani, V. Barone, B. Mennucci, G. A. Petersson, H. Nakatsuji, M. Caricato, X. Li, H. P. Hratchian, A. F. Izmaylov, J. Bloino, G. Zheng, J. L. Sonnenberg, M. Hada, M. Ehara, K. Toyota, R. Fukuda, J. Hasegawa, M. Ishida, T. Nakajima, Y. Honda, O. Kitao, H. Nakai, T. Vreven, J. A. Montgomery, Jr., J. E. Peralta, F. Ogliaro, M. Bearpark, J. J. Heyd, E. Brothers, K. N. Kudin, V. N. Staroverov, T. Keith, R. Kobayashi, J. Normand, K. Raghavachari, A. Rendell, J. C. Burant, S. S. Iyengar, J. Tomasi, M. Cossi, N. Rega, J. M. Millam, M. Klene, J. E. Knox, J. B. Cross, V. Bakken, C. Adamo, J. Jaramillo, R. Gomperts, R. E. Stratmann, O. Yazyev, A. J. Austin, R. Cammi, C. Pomelli, J. W. Ochterski, R. L. Martin, K. Morokuma, V. G. Zakrzewski, G.



- A. Voth, P. Salvador, J. J. Dannenberg, S. Dapprich, A. D. Daniels, O. Farkas, J. B. Foresman, J. V. Ortiz, J. Cioslowski, D. J. Fox, Gaussian, Inc., Wallingford CT, 2010.
16. (a) G. Mazzone, N. Russo and E. Sicilia, *J. Chem. Theory Comput.*, 2015, **11**, 581; (b) A. S. K. Hashmi, *Acc. Chem. Res.*, 2014, **47**, 864; (c) A. Gómez-Suárez and S. P. Nolan, *Angew. Chem., Int. Ed.*, 2012, **51**, 8156.
